# Supplementary material for: FACS-Based Proteomics Enables Profiling of Proteins in Rare Cell Populations
Source: Int J Mol Sci. 2020 Sep 8;21(18):6557. doi: 10.3390/ijms21186557 (PMC7554798; doi:10.3390/ijms21186557)
Supplement: Supplementary file 1 [file ijms-21-06557-s001.xlsx]

## Sheet: 1000 cells
Accession	-10lgP	Coverage (%)	Area	#Peptides	#Unique	PTM	Avg. Mass	Description
Q9NZT1	214.13	67	2967400	6	6	Acetylation (Protein N-term); Deamidation (NQ); Carbamidomethylation (DHKE X@N-term)	15893	Calmodulin-like protein 5 OS=Homo sapiens GN=CALML5 PE=1 SV=2
P06702	167.37	35	4285500	4	4	Propionaldehyde +40	13242	Protein S100-A9 OS=Homo sapiens GN=S100A9 PE=1 SV=1
Q5D862	131.71	3	6641000	4	4	Phosphorylation (STY); Deamidation (NQ); Dimethylation(KR); Methylation(KR); Sodium adduct	248072	Filaggrin-2 OS=Homo sapiens GN=FLG2 PE=1 SV=1
P63261	127.45	12	7825800	4	4	Deamidation (NQ)	41793	Actin cytoplasmic 2 OS=Homo sapiens GN=ACTG1 PE=1 SV=1
P60709	127.45	12	7825800	4	4	Deamidation (NQ)	41737	Actin cytoplasmic 1 OS=Homo sapiens GN=ACTB PE=1 SV=1
P81605	146.09	25	1791100	3	3	Propionaldehyde +40	11284	Dermcidin OS=Homo sapiens GN=DCD PE=1 SV=2
P62805	117.67	29	2729900	3	3		11367	Histone H4 OS=Homo sapiens GN=HIST1H4A PE=1 SV=2
P31944	104.6	8	422390	3	3	Carbamidomethylation	27680	Caspase-14 OS=Homo sapiens GN=CASP14 PE=1 SV=2
Q99878	158.23	30	1613000	2	2	Arginine oxidation to glutamic semialdehyde; Amidination of lysines or N-terminal amines with methyl acetimidate; Replacement of proton with ammonium ion	13936	Histone H2A type 1-J OS=Homo sapiens GN=HIST1H2AJ PE=1 SV=3
Q96KK5	158.23	30	1613000	2	2	Arginine oxidation to glutamic semialdehyde; Amidination of lysines or N-terminal amines with methyl acetimidate; Replacement of proton with ammonium ion	13906	Histone H2A type 1-H OS=Homo sapiens GN=HIST1H2AH PE=1 SV=3
Q9BTM1	158.23	29	1613000	2	2	Arginine oxidation to glutamic semialdehyde; Amidination of lysines or N-terminal amines with methyl acetimidate; Replacement of proton with ammonium ion	14019	Histone H2A.J OS=Homo sapiens GN=H2AFJ PE=1 SV=1
Q7L7L0	158.23	29	1613000	2	2	Arginine oxidation to glutamic semialdehyde; Amidination of lysines or N-terminal amines with methyl acetimidate; Replacement of proton with ammonium ion	14121	Histone H2A type 3 OS=Homo sapiens GN=HIST3H2A PE=1 SV=3
P0C0S8	158.23	29	1613000	2	2	Arginine oxidation to glutamic semialdehyde; Amidination of lysines or N-terminal amines with methyl acetimidate; Replacement of proton with ammonium ion	14091	Histone H2A type 1 OS=Homo sapiens GN=HIST1H2AG PE=1 SV=2
P04908	158.23	29	1613000	2	2	Arginine oxidation to glutamic semialdehyde; Amidination of lysines or N-terminal amines with methyl acetimidate; Replacement of proton with ammonium ion	14135	Histone H2A type 1-B/E OS=Homo sapiens GN=HIST1H2AB PE=1 SV=2
Q93077	158.23	29	1613000	2	2	Arginine oxidation to glutamic semialdehyde; Amidination of lysines or N-terminal amines with methyl acetimidate; Replacement of proton with ammonium ion	14105	Histone H2A type 1-C OS=Homo sapiens GN=HIST1H2AC PE=1 SV=3
P20671	158.23	29	1613000	2	2	Arginine oxidation to glutamic semialdehyde; Amidination of lysines or N-terminal amines with methyl acetimidate; Replacement of proton with ammonium ion	14107	Histone H2A type 1-D OS=Homo sapiens GN=HIST1H2AD PE=1 SV=2
P16104	158.23	27	1613000	2	2	Arginine oxidation to glutamic semialdehyde; Amidination of lysines or N-terminal amines with methyl acetimidate; Replacement of proton with ammonium ion	15145	Histone H2AX OS=Homo sapiens GN=H2AFX PE=1 SV=2
A0A0U1RR32	158.23	22	1613000	2	2	Arginine oxidation to glutamic semialdehyde; Amidination of lysines or N-terminal amines with methyl acetimidate; Replacement of proton with ammonium ion	18482	Histone H2A OS=Homo sapiens GN=hCG_2039566 PE=3 SV=1
A0A0U1RRH7	158.23	22	1613000	2	2	Arginine oxidation to glutamic semialdehyde; Amidination of lysines or N-terminal amines with methyl acetimidate; Replacement of proton with ammonium ion	18553	Histone H2A OS=Homo sapiens PE=3 SV=1
Q8IUE6	158.23	29	1613000	2	2	Arginine oxidation to glutamic semialdehyde; Amidination of lysines or N-terminal amines with methyl acetimidate; Replacement of proton with ammonium ion	13995	Histone H2A type 2-B OS=Homo sapiens GN=HIST2H2AB PE=1 SV=3
P62328	128.58	61	809790	2	2	Oxidation (M); Acetylation (Protein N-term)	5053	Thymosin beta-4 OS=Homo sapiens GN=TMSB4X PE=1 SV=2
P05109	107.03	24	1910000	2	2	Carbamidomethylation	10835	Protein S100-A8 OS=Homo sapiens GN=S100A8 PE=1 SV=1
C9JKR2	93.68	5	303910	2	2		47287	Albumin isoform CRA_k OS=Homo sapiens GN=ALB PE=1 SV=1
H0YA55	93.68	4	303910	2	2		51578	Serum albumin (Fragment) OS=Homo sapiens GN=ALB PE=1 SV=1
D6RHD5	93.68	4	303910	2	2		52059	Serum albumin OS=Homo sapiens GN=ALB PE=1 SV=1
B7WNR0	93.68	4	303910	2	2		56212	Serum albumin OS=Homo sapiens GN=ALB PE=1 SV=1
A0A0C4DGB6	93.68	3	303910	2	2		69227	Serum albumin OS=Homo sapiens GN=ALB PE=1 SV=1
P02768	93.68	3	303910	2	2		69367	Serum albumin OS=Homo sapiens GN=ALB PE=1 SV=2
K7EMV3	63.39	20	131230	2	2		10334	Histone H3 OS=Homo sapiens GN=H3F3B PE=1 SV=1
B4DEB1	63.39	15	131230	2	2		14053	Histone H3 OS=Homo sapiens GN=H3F3A PE=1 SV=1
K7EK07	63.39	14	131230	2	2		14914	Histone H3 (Fragment) OS=Homo sapiens GN=H3F3B PE=1 SV=1
P68431	63.39	13	131230	2	2		15404	Histone H3.1 OS=Homo sapiens GN=HIST1H3A PE=1 SV=2
Q16695	63.39	13	131230	2	2		15508	Histone H3.1t OS=Homo sapiens GN=HIST3H3 PE=1 SV=3
Q71DI3	63.39	13	131230	2	2		15388	Histone H3.2 OS=Homo sapiens GN=HIST2H3A PE=1 SV=3
P84243	63.39	13	131230	2	2		15328	Histone H3.3 OS=Homo sapiens GN=H3F3A PE=1 SV=2
K7ES00	63.39	12	131230	2	2		16621	Histone H3.3 (Fragment) OS=Homo sapiens GN=H3F3B PE=1 SV=1
P47929	57.4	16	414810	2	2		15075	Galectin-7 OS=Homo sapiens GN=LGALS7 PE=1 SV=2
F8VV32	62.43	12	150870	1	1	Carbamidomethylation	11488	Lysozyme C OS=Homo sapiens GN=LYZ PE=1 SV=1
A0A0B4J259	62.43	9	150870	1	1	Carbamidomethylation	15329	Lysozyme C OS=Homo sapiens GN=LYZ PE=1 SV=1
P61626	62.43	8	150870	1	1	Carbamidomethylation	16537	Lysozyme C OS=Homo sapiens GN=LYZ PE=1 SV=1
E7EUT5	60.58	5	0	1	1		27871	Glyceraldehyde-3-phosphate dehydrogenase OS=Homo sapiens GN=GAPDH PE=1 SV=1
P04406	60.58	4	0	1	1		36053	Glyceraldehyde-3-phosphate dehydrogenase OS=Homo sapiens GN=GAPDH PE=1 SV=3
H3BN34	53.53	22	70177	1	1		5584	Pyruvate kinase PKM (Fragment) OS=Homo sapiens GN=PKM PE=1 SV=8
H3BQZ3	53.53	16	70177	1	1		7535	Pyruvate kinase PKM OS=Homo sapiens GN=PKM PE=1 SV=1
H3BU13	53.53	13	70177	1	1		8951	Pyruvate kinase PKM (Fragment) OS=Homo sapiens GN=PKM PE=1 SV=1
H3BT25	53.53	7	70177	1	1		16427	Pyruvate kinase PKM (Fragment) OS=Homo sapiens GN=PKM PE=1 SV=1
H3BUW1	53.53	7	70177	1	1		17820	Pyruvate kinase PKM (Fragment) OS=Homo sapiens GN=PKM PE=1 SV=1
H3BTJ2	53.53	7	70177	1	1		18477	Pyruvate kinase PKM (Fragment) OS=Homo sapiens GN=PKM PE=1 SV=1
H3BQ34	53.53	4	70177	1	1		30720	Pyruvate kinase OS=Homo sapiens GN=PKM PE=1 SV=1
B4DNK4	53.53	2	70177	1	1		49898	Pyruvate kinase OS=Homo sapiens GN=PKM PE=1 SV=1
H3BTN5	53.53	2	70177	1	1		53045	Pyruvate kinase (Fragment) OS=Homo sapiens GN=PKM PE=1 SV=1
P14618	53.53	2	70177	1	1		57937	Pyruvate kinase PKM OS=Homo sapiens GN=PKM PE=1 SV=4
P08670	51.28	2	154860	1	1		53652	Vimentin OS=Homo sapiens GN=VIM PE=1 SV=4
Q5JVS8	51.28	6	154860	1	1		20036	Vimentin (Fragment) OS=Homo sapiens GN=VIM PE=1 SV=1
B0YJC5	51.28	4	154860	1	1		26859	Vimentin OS=Homo sapiens GN=VIM PE=1 SV=1
B0YJC4	51.28	2	154860	1	1		49653	Vimentin OS=Homo sapiens GN=VIM PE=1 SV=1
P05089	49.27	3	134910	1	1		34735	Arginase-1 OS=Homo sapiens GN=ARG1 PE=1 SV=2
Q99880	48.63	7	2999400	1	1		13952	Histone H2B type 1-L OS=Homo sapiens GN=HIST1H2BL PE=1 SV=3
Q8N257	48.63	7	2999400	1	1		13908	Histone H2B type 3-B OS=Homo sapiens GN=HIST3H2BB PE=1 SV=3
P06899	48.63	7	2999400	1	1		13904	Histone H2B type 1-J OS=Homo sapiens GN=HIST1H2BJ PE=1 SV=3
P33778	48.63	7	2999400	1	1		13950	Histone H2B type 1-B OS=Homo sapiens GN=HIST1H2BB PE=1 SV=2
P57053	48.63	7	2999400	1	1		13944	Histone H2B type F-S OS=Homo sapiens GN=H2BFS PE=1 SV=2
P58876	48.63	7	2999400	1	1		13936	Histone H2B type 1-D OS=Homo sapiens GN=HIST1H2BD PE=1 SV=2
Q99879	48.63	7	2999400	1	1		13989	Histone H2B type 1-M OS=Homo sapiens GN=HIST1H2BM PE=1 SV=3
Q5QNW6	48.63	7	2999400	1	1		13920	Histone H2B type 2-F OS=Homo sapiens GN=HIST2H2BF PE=1 SV=3
P23527	48.63	7	2999400	1	1		13906	Histone H2B type 1-O OS=Homo sapiens GN=HIST1H2BO PE=1 SV=3
O60814	48.63	7	2999400	1	1		13890	Histone H2B type 1-K OS=Homo sapiens GN=HIST1H2BK PE=1 SV=3
P62807	48.63	7	2999400	1	1		13906	Histone H2B type 1-C/E/F/G/I OS=Homo sapiens GN=HIST1H2BC PE=1 SV=4
Q99877	48.63	7	2999400	1	1		13922	Histone H2B type 1-N OS=Homo sapiens GN=HIST1H2BN PE=1 SV=3
Q93079	48.63	7	2999400	1	1		13892	Histone H2B type 1-H OS=Homo sapiens GN=HIST1H2BH PE=1 SV=3
Q16778	48.63	7	2999400	1	1		13920	Histone H2B type 2-E OS=Homo sapiens GN=HIST2H2BE PE=1 SV=3
Q96A08	48.63	7	2999400	1	1		14167	Histone H2B type 1-A OS=Homo sapiens GN=HIST1H2BA PE=1 SV=3
U3KQK0	48.63	5	2999400	1	1		18804	Histone H2B OS=Homo sapiens GN=HIST1H2BN PE=1 SV=1
A0A087WU59	42.73	18	298140	1	1		9292	Protocadherin gamma-C4 (Fragment) OS=Homo sapiens GN=PCDHGC4 PE=1 SV=1
Q9Y5F7	42.73	2	298140	1	1		101214	Protocadherin gamma-C4 OS=Homo sapiens GN=PCDHGC4 PE=2 SV=1
Q6VVX0	39.33	1	5276100	1	1		57359	Vitamin D 25-hydroxylase OS=Homo sapiens GN=CYP2R1 PE=1 SV=1
P22492	36.79	5	97210	1	1		22019	Histone H1t OS=Homo sapiens GN=HIST1H1T PE=2 SV=4
P16403	36.79	5	97210	1	1		21365	Histone H1.2 OS=Homo sapiens GN=HIST1H1C PE=1 SV=2
P10412	36.79	5	97210	1	1		21865	Histone H1.4 OS=Homo sapiens GN=HIST1H1E PE=1 SV=2
A0A087WVQ9	36.65	2	436320	1	1		47883	Elongation factor 1-alpha 1 OS=Homo sapiens GN=EEF1A1 PE=1 SV=1
Q5VTE0	36.65	2	436320	1	1		50185	Putative elongation factor 1-alpha-like 3 OS=Homo sapiens GN=EEF1A1P5 PE=5 SV=1
P68104	36.65	2	436320	1	1		50141	Elongation factor 1-alpha 1 OS=Homo sapiens GN=EEF1A1 PE=1 SV=1
Q05639	36.65	2	436320	1	1		50470	Elongation factor 1-alpha 2 OS=Homo sapiens GN=EEF1A2 PE=1 SV=1

## Sheet: 5000 cells
Accession	-10lgP	Coverage (%)	Area	#Peptides	#Unique	PTM	Avg. Mass	Description
P08670	255.33	38	1957500	16	14	Carbamidomethylation; Oxidation (M); Deamidation (NQ); Pyro-glu from Q; Carbamidomethylation (DHKE X@N-term)	53652	Vimentin OS=Homo sapiens GN=VIM PE=1 SV=4
B0YJC4	255.33	41	1957500	16	14	Carbamidomethylation; Oxidation (M); Deamidation (NQ); Pyro-glu from Q; Carbamidomethylation (DHKE X@N-term)	49653	Vimentin OS=Homo sapiens GN=VIM PE=1 SV=1
Q86YZ3	306.68	3	2621200	8	8	Pyro-glu from Q	282389	Hornerin OS=Homo sapiens GN=HRNR PE=1 SV=2
H0YMD0	192.83	36	339450	6	6	Carbamidomethylation; Acetylation (Protein N-term)	25342	Annexin (Fragment) OS=Homo sapiens GN=ANXA2 PE=1 SV=1
H0YMU9	192.83	35	339450	6	6	Carbamidomethylation; Acetylation (Protein N-term)	25569	Annexin OS=Homo sapiens GN=ANXA2 PE=1 SV=1
H0YN42	192.83	32	339450	6	6	Carbamidomethylation; Acetylation (Protein N-term)	28825	Annexin (Fragment) OS=Homo sapiens GN=ANXA2 PE=1 SV=1
P07355	192.83	24	339450	6	6	Carbamidomethylation; Acetylation (Protein N-term)	38604	Annexin A2 OS=Homo sapiens GN=ANXA2 PE=1 SV=2
P06733	188.69	18	1002600	6	6	Deamidation (NQ); Carbamidomethylation (DHKE X@N-term)	47169	Alpha-enolase OS=Homo sapiens GN=ENO1 PE=1 SV=2
P60709	299.12	39	4766900	12	5	Carbamidomethylation; Oxidation (M); Acetylation (Protein N-term); Deamidation (NQ); Pyro-glu from Q; Carbamidomethylation (DHKE X@N-term)	41737	Actin cytoplasmic 1 OS=Homo sapiens GN=ACTB PE=1 SV=1
F5H2R5	222.62	69	648940	5	5	Carbamidomethylation (DHKE X@N-term)	9792	Rho GDP-dissociation inhibitor 2 (Fragment) OS=Homo sapiens GN=ARHGDIB PE=1 SV=1
F5H6Q0	222.62	54	648940	5	5	Carbamidomethylation (DHKE X@N-term)	12530	Rho GDP-dissociation inhibitor 2 (Fragment) OS=Homo sapiens GN=ARHGDIB PE=1 SV=1
F5H3P3	222.62	39	648940	5	5	Carbamidomethylation (DHKE X@N-term)	17837	Rho GDP-dissociation inhibitor 2 (Fragment) OS=Homo sapiens GN=ARHGDIB PE=1 SV=8
P52566	222.62	30	648940	5	5	Carbamidomethylation (DHKE X@N-term)	22988	Rho GDP-dissociation inhibitor 2 OS=Homo sapiens GN=ARHGDIB PE=1 SV=3
P16403	199.62	21	1550600	5	5	Acetylation (Protein N-term); Deamidation (NQ)	21365	Histone H1.2 OS=Homo sapiens GN=HIST1H1C PE=1 SV=2
P06702	186.89	52	10570000	5	5	Oxidation (M); Deamidation (NQ); Carbamidomethylation (DHKE X@N-term); Propionaldehyde +40; Acetaldehyde +26	13242	Protein S100-A9 OS=Homo sapiens GN=S100A9 PE=1 SV=1
B8ZZQ6	207.72	36	531530	4	4	Acetylation (Protein N-term); Deamidation (NQ)	11759	Prothymosin alpha OS=Homo sapiens GN=PTMA PE=1 SV=1
P06454	207.72	34	531530	4	4	Acetylation (Protein N-term); Deamidation (NQ)	12203	Prothymosin alpha OS=Homo sapiens GN=PTMA PE=1 SV=2
P62328	186.92	77	3116100	4	4	Oxidation (M); Acetylation (Protein N-term); Carbamidomethylation (DHKE X@N-term)	5053	Thymosin beta-4 OS=Homo sapiens GN=TMSB4X PE=1 SV=2
P62158	175.32	37	367720	4	4	Acetylation (N-term); Deamidation (NQ)	16838	Calmodulin OS=Homo sapiens GN=CALM1 PE=1 SV=2
H0Y7A7	175.32	29	367720	4	4	Acetylation (N-term); Deamidation (NQ)	20762	Calmodulin (Fragment) OS=Homo sapiens GN=CALM2 PE=1 SV=1
P61626	154.28	24	1690500	4	4	Carbamidomethylation; Deamidation (NQ); Dihydroxy	16537	Lysozyme C OS=Homo sapiens GN=LYZ PE=1 SV=1
F8VV32	154.28	35	1690500	4	4	Carbamidomethylation; Deamidation (NQ); Dihydroxy	11488	Lysozyme C OS=Homo sapiens GN=LYZ PE=1 SV=1
A0A0B4J259	154.28	26	1690500	4	4	Carbamidomethylation; Deamidation (NQ); Dihydroxy	15329	Lysozyme C OS=Homo sapiens GN=LYZ PE=1 SV=1
P62805	152.79	39	3773200	4	4	Carbamidomethylation (DHKE X@N-term)	11367	Histone H4 OS=Homo sapiens GN=HIST1H4A PE=1 SV=2
P05164	151.62	6	323280	4	4	Carbamidomethylation	83869	Myeloperoxidase OS=Homo sapiens GN=MPO PE=1 SV=1
P13796	119.99	7	383630	4	4	Carbamidomethylation; Carbamidomethylation (DHKE X@N-term)	70289	Plastin-2 OS=Homo sapiens GN=LCP1 PE=1 SV=6
P05109	164.86	25	5572700	3	3	Carbamidomethylation; Deamidation (NQ); Carbamidomethylation (DHKE X@N-term); Dihydroxy	10835	Protein S100-A8 OS=Homo sapiens GN=S100A8 PE=1 SV=1
P81605	157.51	29	1635400	3	3	Deamidation (NQ); Propionaldehyde +40	11284	Dermcidin OS=Homo sapiens GN=DCD PE=1 SV=2
P04406	151.81	11	458360	3	3	Deamidation (NQ)	36053	Glyceraldehyde-3-phosphate dehydrogenase OS=Homo sapiens GN=GAPDH PE=1 SV=3
P16401	137.56	17	587550	3	3	Acetylation (Protein N-term); Aminoethylcysteine	22580	Histone H1.5 OS=Homo sapiens GN=HIST1H1B PE=1 SV=3
A0A0B4J1R6	111.63	9	334890	3	3		49910	Transketolase OS=Homo sapiens GN=TKT PE=1 SV=1
P29401	111.63	6	334890	3	3		67878	Transketolase OS=Homo sapiens GN=TKT PE=1 SV=3
P04075	107.57	9	162470	3	3	Carbamidomethylation	39420	Fructose-bisphosphate aldolase A OS=Homo sapiens GN=ALDOA PE=1 SV=2
J3KPS3	107.57	9	162470	3	3	Carbamidomethylation	39818	Fructose-bisphosphate aldolase OS=Homo sapiens GN=ALDOA PE=1 SV=1
Q99878	163.68	30	2126200	2	2	Deamidation (NQ); Carbamidomethylation (DHKE X@N-term)	13936	Histone H2A type 1-J OS=Homo sapiens GN=HIST1H2AJ PE=1 SV=3
Q96KK5	163.68	30	2126200	2	2	Deamidation (NQ); Carbamidomethylation (DHKE X@N-term)	13906	Histone H2A type 1-H OS=Homo sapiens GN=HIST1H2AH PE=1 SV=3
Q9BTM1	163.68	29	2126200	2	2	Deamidation (NQ); Carbamidomethylation (DHKE X@N-term)	14019	Histone H2A.J OS=Homo sapiens GN=H2AFJ PE=1 SV=1
Q7L7L0	163.68	29	2126200	2	2	Deamidation (NQ); Carbamidomethylation (DHKE X@N-term)	14121	Histone H2A type 3 OS=Homo sapiens GN=HIST3H2A PE=1 SV=3
P0C0S8	163.68	29	2126200	2	2	Deamidation (NQ); Carbamidomethylation (DHKE X@N-term)	14091	Histone H2A type 1 OS=Homo sapiens GN=HIST1H2AG PE=1 SV=2
P04908	163.68	29	2126200	2	2	Deamidation (NQ); Carbamidomethylation (DHKE X@N-term)	14135	Histone H2A type 1-B/E OS=Homo sapiens GN=HIST1H2AB PE=1 SV=2
Q93077	163.68	29	2126200	2	2	Deamidation (NQ); Carbamidomethylation (DHKE X@N-term)	14105	Histone H2A type 1-C OS=Homo sapiens GN=HIST1H2AC PE=1 SV=3
P20671	163.68	29	2126200	2	2	Deamidation (NQ); Carbamidomethylation (DHKE X@N-term)	14107	Histone H2A type 1-D OS=Homo sapiens GN=HIST1H2AD PE=1 SV=2
P16104	163.68	27	2126200	2	2	Deamidation (NQ); Carbamidomethylation (DHKE X@N-term)	15145	Histone H2AX OS=Homo sapiens GN=H2AFX PE=1 SV=2
A0A0U1RR32	163.68	22	2126200	2	2	Deamidation (NQ); Carbamidomethylation (DHKE X@N-term)	18482	Histone H2A OS=Homo sapiens GN=hCG_2039566 PE=3 SV=1
A0A0U1RRH7	163.68	22	2126200	2	2	Deamidation (NQ); Carbamidomethylation (DHKE X@N-term)	18553	Histone H2A OS=Homo sapiens PE=3 SV=1
Q8IUE6	163.68	29	2126200	2	2	Deamidation (NQ); Carbamidomethylation (DHKE X@N-term)	13995	Histone H2A type 2-B OS=Homo sapiens GN=HIST2H2AB PE=1 SV=3
K7EJ44	141.55	27	272310	2	2	Deamidation (NQ)	11390	Profilin OS=Homo sapiens GN=PFN1 PE=1 SV=1
P07737	141.55	20	272310	2	2	Deamidation (NQ)	15054	Profilin-1 OS=Homo sapiens GN=PFN1 PE=1 SV=2
P08238	128.26	3	80012	2	2		83264	Heat shock protein HSP 90-beta OS=Homo sapiens GN=HSP90AB1 PE=1 SV=4
P07900	128.26	3	80012	2	2		84660	Heat shock protein HSP 90-alpha OS=Homo sapiens GN=HSP90AA1 PE=1 SV=5
P04083	116.96	8	121830	2	2		38714	Annexin A1 OS=Homo sapiens GN=ANXA1 PE=1 SV=2
E9PP50	108.84	14	703490	2	2	Acetylation (Protein N-term)	17778	Cofilin-1 (Fragment) OS=Homo sapiens GN=CFL1 PE=1 SV=8
P23528	108.84	14	703490	2	2	Acetylation (Protein N-term)	18502	Cofilin-1 OS=Homo sapiens GN=CFL1 PE=1 SV=3
P60174	105.31	9	73166	2	2	Carbamidomethylation	30791	Triosephosphate isomerase OS=Homo sapiens GN=TPI1 PE=1 SV=3
Q99880	102.91	16	3211300	2	2	Pyro-glu from Q; Carbamidomethylation (DHKE X@N-term)	13952	Histone H2B type 1-L OS=Homo sapiens GN=HIST1H2BL PE=1 SV=3
P06899	102.91	16	3211300	2	2	Pyro-glu from Q; Carbamidomethylation (DHKE X@N-term)	13904	Histone H2B type 1-J OS=Homo sapiens GN=HIST1H2BJ PE=1 SV=3
P33778	102.91	16	3211300	2	2	Pyro-glu from Q; Carbamidomethylation (DHKE X@N-term)	13950	Histone H2B type 1-B OS=Homo sapiens GN=HIST1H2BB PE=1 SV=2
P57053	102.91	16	3211300	2	2	Pyro-glu from Q; Carbamidomethylation (DHKE X@N-term)	13944	Histone H2B type F-S OS=Homo sapiens GN=H2BFS PE=1 SV=2
P58876	102.91	16	3211300	2	2	Pyro-glu from Q; Carbamidomethylation (DHKE X@N-term)	13936	Histone H2B type 1-D OS=Homo sapiens GN=HIST1H2BD PE=1 SV=2
Q99879	102.91	16	3211300	2	2	Pyro-glu from Q; Carbamidomethylation (DHKE X@N-term)	13989	Histone H2B type 1-M OS=Homo sapiens GN=HIST1H2BM PE=1 SV=3
Q5QNW6	102.91	16	3211300	2	2	Pyro-glu from Q; Carbamidomethylation (DHKE X@N-term)	13920	Histone H2B type 2-F OS=Homo sapiens GN=HIST2H2BF PE=1 SV=3
P23527	102.91	16	3211300	2	2	Pyro-glu from Q; Carbamidomethylation (DHKE X@N-term)	13906	Histone H2B type 1-O OS=Homo sapiens GN=HIST1H2BO PE=1 SV=3
O60814	102.91	16	3211300	2	2	Pyro-glu from Q; Carbamidomethylation (DHKE X@N-term)	13890	Histone H2B type 1-K OS=Homo sapiens GN=HIST1H2BK PE=1 SV=3
P62807	102.91	16	3211300	2	2	Pyro-glu from Q; Carbamidomethylation (DHKE X@N-term)	13906	Histone H2B type 1-C/E/F/G/I OS=Homo sapiens GN=HIST1H2BC PE=1 SV=4
Q99877	102.91	16	3211300	2	2	Pyro-glu from Q; Carbamidomethylation (DHKE X@N-term)	13922	Histone H2B type 1-N OS=Homo sapiens GN=HIST1H2BN PE=1 SV=3
Q93079	102.91	16	3211300	2	2	Pyro-glu from Q; Carbamidomethylation (DHKE X@N-term)	13892	Histone H2B type 1-H OS=Homo sapiens GN=HIST1H2BH PE=1 SV=3
Q16778	102.91	16	3211300	2	2	Pyro-glu from Q; Carbamidomethylation (DHKE X@N-term)	13920	Histone H2B type 2-E OS=Homo sapiens GN=HIST2H2BE PE=1 SV=3
Q96A08	102.91	16	3211300	2	2	Pyro-glu from Q; Carbamidomethylation (DHKE X@N-term)	14167	Histone H2B type 1-A OS=Homo sapiens GN=HIST1H2BA PE=1 SV=3
U3KQK0	102.91	12	3211300	2	2	Pyro-glu from Q; Carbamidomethylation (DHKE X@N-term)	18804	Histone H2B OS=Homo sapiens GN=HIST1H2BN PE=1 SV=1
Q8N257	102.91	16	3211300	2	2	Pyro-glu from Q; Carbamidomethylation (DHKE X@N-term)	13908	Histone H2B type 3-B OS=Homo sapiens GN=HIST3H2BB PE=1 SV=3
E9PBF6	92.26	6	76824	2	2		44643	Lamin-B1 OS=Homo sapiens GN=LMNB1 PE=1 SV=1
P20700	92.26	4	76824	2	2		66408	Lamin-B1 OS=Homo sapiens GN=LMNB1 PE=1 SV=2
A0A0D9SFE5	92.26	7	76824	2	2		37581	Lamin B1 isoform CRA_a OS=Homo sapiens GN=LMNB1 PE=1 SV=1
P26038	87.25	3	115320	2	2		67820	Moesin OS=Homo sapiens GN=MSN PE=1 SV=3
A0A087WVQ9	86.23	4	525720	2	2		47883	Elongation factor 1-alpha 1 OS=Homo sapiens GN=EEF1A1 PE=1 SV=1
Q5VTE0	86.23	4	525720	2	2		50185	Putative elongation factor 1-alpha-like 3 OS=Homo sapiens GN=EEF1A1P5 PE=5 SV=1
P68104	86.23	4	525720	2	2		50141	Elongation factor 1-alpha 1 OS=Homo sapiens GN=EEF1A1 PE=1 SV=1
Q05639	86.23	4	525720	2	2		50470	Elongation factor 1-alpha 2 OS=Homo sapiens GN=EEF1A2 PE=1 SV=1
D6R904	82.22	23	178790	2	2	Acetylation (Protein N-term)	11017	Tropomyosin alpha-3 chain OS=Homo sapiens GN=TPM3 PE=1 SV=1
A0A087WWU8	82.22	10	178790	2	2	Acetylation (Protein N-term)	26421	Tropomyosin alpha-3 chain OS=Homo sapiens GN=TPM3 PE=1 SV=1
Q5HYB6	82.22	9	178790	2	2	Acetylation (Protein N-term)	27176	Epididymis luminal protein 189 OS=Homo sapiens GN=DKFZp686J1372 PE=1 SV=1
H3BTN5	69.88	4	300370	2	2		53045	Pyruvate kinase (Fragment) OS=Homo sapiens GN=PKM PE=1 SV=1
P14618	69.88	4	300370	2	2		57937	Pyruvate kinase PKM OS=Homo sapiens GN=PKM PE=1 SV=4
H3BQ34	69.88	7	300370	2	2		30720	Pyruvate kinase OS=Homo sapiens GN=PKM PE=1 SV=1
H3BT25	69.88	14	300370	2	2		16427	Pyruvate kinase PKM (Fragment) OS=Homo sapiens GN=PKM PE=1 SV=1
H3BUW1	69.88	13	300370	2	2		17820	Pyruvate kinase PKM (Fragment) OS=Homo sapiens GN=PKM PE=1 SV=1
H3BTJ2	69.88	12	300370	2	2		18477	Pyruvate kinase PKM (Fragment) OS=Homo sapiens GN=PKM PE=1 SV=1
M0R1V7	64.42	35	194780	2	2		7132	Ubiquitin-60S ribosomal protein L40 (Fragment) OS=Homo sapiens GN=UBA52 PE=1 SV=1
J3QS39	64.42	24	194780	2	2		10469	Polyubiquitin-B (Fragment) OS=Homo sapiens GN=UBB PE=1 SV=1
J3QTR3	64.42	21	194780	2	2		12237	Ubiquitin-40S ribosomal protein S27a (Fragment) OS=Homo sapiens GN=RPS27A PE=1 SV=1
M0R1M6	64.42	19	194780	2	2		12803	Ubiquitin-60S ribosomal protein L40 (Fragment) OS=Homo sapiens GN=UBA52 PE=1 SV=1
F5H6Q2	64.42	18	194780	2	2		13732	Polyubiquitin-C (Fragment) OS=Homo sapiens GN=UBC PE=1 SV=8
P62987	64.42	17	194780	2	2		14728	Ubiquitin-60S ribosomal protein L40 OS=Homo sapiens GN=UBA52 PE=1 SV=2
F5GYU3	64.42	16	194780	2	2		15032	Polyubiquitin-C (Fragment) OS=Homo sapiens GN=UBC PE=1 SV=1
F5H2Z3	64.42	16	194780	2	2		15310	Polyubiquitin-C (Fragment) OS=Homo sapiens GN=UBC PE=1 SV=1
M0R2S1	64.42	16	194780	2	2		15476	Ubiquitin-60S ribosomal protein L40 (Fragment) OS=Homo sapiens GN=UBA52 PE=1 SV=1
F5H265	64.42	15	194780	2	2		16841	Polyubiquitin-C (Fragment) OS=Homo sapiens GN=UBC PE=1 SV=1
B4DV12	64.42	14	194780	2	2		17215	Polyubiquitin-B OS=Homo sapiens GN=UBB PE=1 SV=1
F5H388	64.42	14	194780	2	2		17484	Polyubiquitin-C (Fragment) OS=Homo sapiens GN=UBC PE=1 SV=1
F5H747	64.42	14	194780	2	2		18073	Polyubiquitin-C (Fragment) OS=Homo sapiens GN=UBC PE=1 SV=8
F5GXK7	64.42	13	194780	2	2		19016	Polyubiquitin-C (Fragment) OS=Homo sapiens GN=UBC PE=1 SV=2
J3QKN0	64.42	11	194780	2	2		23163	Polyubiquitin-B (Fragment) OS=Homo sapiens GN=UBB PE=1 SV=1
Q96C32	64.42	7	194780	2	2		34304	Polyubiquitin-C OS=Homo sapiens GN=UBC PE=1 SV=1
P0CG48	64.42	3	194780	2	2		77039	Polyubiquitin-C OS=Homo sapiens GN=UBC PE=1 SV=3
P09382	57.53	12	250200	2	2		14716	Galectin-1 OS=Homo sapiens GN=LGALS1 PE=1 SV=2
P63267	220.57	22	117360	8	1	Oxidation (M); Deamidation (NQ); Carbamidomethylation (DHKE X@N-term)	41877	Actin gamma-enteric smooth muscle OS=Homo sapiens GN=ACTG2 PE=1 SV=1
P68032	220.57	22	117360	8	1	Oxidation (M); Deamidation (NQ); Carbamidomethylation (DHKE X@N-term)	42019	Actin alpha cardiac muscle 1 OS=Homo sapiens GN=ACTC1 PE=1 SV=1
P68133	220.57	22	117360	8	1	Oxidation (M); Deamidation (NQ); Carbamidomethylation (DHKE X@N-term)	42051	Actin alpha skeletal muscle OS=Homo sapiens GN=ACTA1 PE=1 SV=1
P62736	220.57	22	117360	8	1	Oxidation (M); Deamidation (NQ); Carbamidomethylation (DHKE X@N-term)	42009	Actin aortic smooth muscle OS=Homo sapiens GN=ACTA2 PE=1 SV=1
Q562R1	143.64	11	73981	3	1	Deamidation (NQ); Carbamidomethylation (DHKE X@N-term)	42003	Beta-actin-like protein 2 OS=Homo sapiens GN=ACTBL2 PE=1 SV=2
P31146	101.82	3	130470	1	1		51026	Coronin-1A OS=Homo sapiens GN=CORO1A PE=1 SV=4
H7BY16	90.52	7	135270	1	1		32390	Nucleolin (Fragment) OS=Homo sapiens GN=NCL PE=1 SV=8
P19338	90.52	3	135270	1	1		76615	Nucleolin OS=Homo sapiens GN=NCL PE=1 SV=3
E5RGE1	86.82	27	36045	1	1		5763	14-3-3 protein zeta/delta (Fragment) OS=Homo sapiens GN=YWHAZ PE=1 SV=8
E5RIR4	86.82	19	36045	1	1		8434	14-3-3 protein zeta/delta (Fragment) OS=Homo sapiens GN=YWHAZ PE=1 SV=1
E9PD24	86.82	15	36045	1	1		10612	14-3-3 protein zeta/delta (Fragment) OS=Homo sapiens GN=YWHAZ PE=1 SV=1
E7EVZ2	86.82	14	36045	1	1		11270	14-3-3 protein zeta/delta (Fragment) OS=Homo sapiens GN=YWHAZ PE=1 SV=1
E7ESK7	86.82	10	36045	1	1		15697	14-3-3 protein zeta/delta (Fragment) OS=Homo sapiens GN=YWHAZ PE=1 SV=1
P63104	86.82	6	36045	1	1		27745	14-3-3 protein zeta/delta OS=Homo sapiens GN=YWHAZ PE=1 SV=1
E7EX29	86.82	6	36045	1	1		28037	14-3-3 protein zeta/delta (Fragment) OS=Homo sapiens GN=YWHAZ PE=1 SV=1
J3KS60	80.31	17	34525	1	1		9944	Rho GDP-dissociation inhibitor 1 OS=Homo sapiens GN=ARHGDIA PE=1 SV=1
J3KRE2	80.31	12	34525	1	1		14814	Rho GDP-dissociation inhibitor 1 OS=Homo sapiens GN=ARHGDIA PE=1 SV=1
J3KTF8	80.31	8	34525	1	1		21517	Rho GDP-dissociation inhibitor 1 (Fragment) OS=Homo sapiens GN=ARHGDIA PE=1 SV=8
P52565	80.31	8	34525	1	1		23207	Rho GDP-dissociation inhibitor 1 OS=Homo sapiens GN=ARHGDIA PE=1 SV=3
J3QQX2	80.31	7	34525	1	1		25831	Rho GDP-dissociation inhibitor 1 OS=Homo sapiens GN=ARHGDIA PE=1 SV=1
J3KRY1	80.31	6	34525	1	1		27140	Rho GDP-dissociation inhibitor 1 (Fragment) OS=Homo sapiens GN=ARHGDIA PE=1 SV=1
F8W1R7	79.89	9	73125	1	1		16290	Myosin light polypeptide 6 OS=Homo sapiens GN=MYL6 PE=1 SV=1
P60660	79.89	9	73125	1	1		16930	Myosin light polypeptide 6 OS=Homo sapiens GN=MYL6 PE=1 SV=2
G8JLA2	79.89	9	73125	1	1		17089	Myosin light polypeptide 6 OS=Homo sapiens GN=MYL6 PE=1 SV=1
J3KND3	79.89	9	73125	1	1		17058	Myosin light polypeptide 6 OS=Homo sapiens GN=MYL6 PE=1 SV=1
G3V1V0	79.89	8	73125	1	1		18037	Myosin light polypeptide 6 OS=Homo sapiens GN=MYL6 PE=1 SV=1
B7Z6Z4	79.89	5	73125	1	1		26707	Myosin light polypeptide 6 OS=Homo sapiens GN=MYL6 PE=1 SV=1
F8VPF3	79.89	10	73125	1	1		14436	Myosin light polypeptide 6 (Fragment) OS=Homo sapiens GN=MYL6 PE=1 SV=1
F8W1I5	79.89	7	73125	1	1		19036	Myosin light chain 6B OS=Homo sapiens GN=MYL6B PE=1 SV=1
P14649	79.89	6	73125	1	1		22764	Myosin light chain 6B OS=Homo sapiens GN=MYL6B PE=1 SV=1
E9PKE3	79.78	6	10969	2	1		68806	Heat shock cognate 71 kDa protein OS=Homo sapiens GN=HSPA8 PE=1 SV=1
P54652	79.78	6	10969	2	1		70021	Heat shock-related 70 kDa protein 2 OS=Homo sapiens GN=HSPA2 PE=1 SV=1
P11142	79.78	6	10969	2	1		70898	Heat shock cognate 71 kDa protein OS=Homo sapiens GN=HSPA8 PE=1 SV=1
P04040	65.84	2	31862	1	1		59756	Catalase OS=Homo sapiens GN=CAT PE=1 SV=3
P62263	61.85	9	51803	1	1		16273	40S ribosomal protein S14 OS=Homo sapiens GN=RPS14 PE=1 SV=3
A8MW50	60.06	5	79632	1	1	Carbamidomethylation	25218	L-lactate dehydrogenase (Fragment) OS=Homo sapiens GN=LDHB PE=1 SV=1
P07195	60.06	4	79632	1	1	Carbamidomethylation	36639	L-lactate dehydrogenase B chain OS=Homo sapiens GN=LDHB PE=1 SV=2
O60906	59.72	3	1255800	1	1		47646	Sphingomyelin phosphodiesterase 2 OS=Homo sapiens GN=SMPD2 PE=1 SV=2
P11021	59.5	3	103480	2	1		72333	78 kDa glucose-regulated protein OS=Homo sapiens GN=HSPA5 PE=1 SV=2
Q5T123	54.82	11	120460	1	1		9381	SH3 domain-binding glutamic acid-rich-like protein 3 OS=Homo sapiens GN=SH3BGRL3 PE=1 SV=1
Q9H299	54.82	11	120460	1	1		10438	SH3 domain-binding glutamic acid-rich-like protein 3 OS=Homo sapiens GN=SH3BGRL3 PE=1 SV=1
E9PMA9	51.26	14	0	1	1		8428	Ribonuclease inhibitor OS=Homo sapiens GN=RNH1 PE=1 SV=1
E9PMN0	51.26	7	0	1	1		18106	Ribonuclease inhibitor OS=Homo sapiens GN=RNH1 PE=1 SV=1
E9PIK5	51.26	6	0	1	1		19228	Ribonuclease inhibitor (Fragment) OS=Homo sapiens GN=RNH1 PE=1 SV=1
E9PMJ3	51.26	6	0	1	1		20476	Ribonuclease inhibitor (Fragment) OS=Homo sapiens GN=RNH1 PE=1 SV=1
E9PLZ3	51.26	6	0	1	1		20990	Ribonuclease inhibitor (Fragment) OS=Homo sapiens GN=RNH1 PE=1 SV=1
E9PIM9	51.26	6	0	1	1		21521	Ribonuclease inhibitor (Fragment) OS=Homo sapiens GN=RNH1 PE=1 SV=1
P13489	51.26	2	0	1	1		49974	Ribonuclease inhibitor OS=Homo sapiens GN=RNH1 PE=1 SV=2
H7BZJ3	51.09	9	37721	1	1		13519	Protein disulfide-isomerase A3 (Fragment) OS=Homo sapiens GN=PDIA3 PE=1 SV=1
P30101	51.09	2	37721	1	1		56782	Protein disulfide-isomerase A3 OS=Homo sapiens GN=PDIA3 PE=1 SV=4
A8MUF7	47.36	11	48485	1	1		9470	Hemoglobin subunit epsilon (Fragment) OS=Homo sapiens GN=HBE1 PE=1 SV=1
F8W6P5	47.36	11	48485	1	1		9670	Hemoglobin subunit beta (Fragment) OS=Homo sapiens GN=HBB PE=1 SV=1
E9PEW8	47.36	10	48485	1	1		11346	Hemoglobin subunit delta (Fragment) OS=Homo sapiens GN=HBD PE=1 SV=1
E9PBW4	47.36	7	48485	1	1		15319	Hemoglobin subunit gamma-2 OS=Homo sapiens GN=HBG2 PE=1 SV=1
E9PFT6	47.36	7	48485	1	1		15420	Hemoglobin subunit delta OS=Homo sapiens GN=HBD PE=1 SV=1
P68871	47.36	7	48485	1	1		15998	Hemoglobin subunit beta OS=Homo sapiens GN=HBB PE=1 SV=2
P02042	47.36	7	48485	1	1		16055	Hemoglobin subunit delta OS=Homo sapiens GN=HBD PE=1 SV=2
P69891	47.36	7	48485	1	1		16140	Hemoglobin subunit gamma-1 OS=Homo sapiens GN=HBG1 PE=1 SV=2
P02100	47.36	7	48485	1	1		16203	Hemoglobin subunit epsilon OS=Homo sapiens GN=HBE1 PE=1 SV=2
P69892	47.36	7	48485	1	1		16126	Hemoglobin subunit gamma-2 OS=Homo sapiens GN=HBG2 PE=1 SV=2
P31949	44.42	9	365430	1	1		11740	Protein S100-A11 OS=Homo sapiens GN=S100A11 PE=1 SV=2
K7EQ48	43.87	1	62911	1	1		53402	Glucose-6-phosphate isomerase OS=Homo sapiens GN=GPI PE=1 SV=2
P06744	43.87	1	62911	1	1		63147	Glucose-6-phosphate isomerase OS=Homo sapiens GN=GPI PE=1 SV=4
A0A0A0MTS2	43.87	1	62911	1	1		64825	Glucose-6-phosphate isomerase (Fragment) OS=Homo sapiens GN=GPI PE=1 SV=1
Q8N196	43.87	1	62911	1	1		74562	Homeobox protein SIX5 OS=Homo sapiens GN=SIX5 PE=1 SV=3
Q5ST81	43.75	2	131160	1	1		41742	Tubulin beta chain OS=Homo sapiens GN=TUBB PE=1 SV=1
Q5JP53	43.75	2	131160	1	1		47767	Tubulin beta chain OS=Homo sapiens GN=TUBB PE=1 SV=1
A6NNZ2	43.75	2	131160	1	1		49573	Tubulin beta-8 chain-like protein LOC260334 OS=Homo sapiens PE=1 SV=1
P07437	43.75	2	131160	1	1		49671	Tubulin beta chain OS=Homo sapiens GN=TUBB PE=1 SV=2
Q13885	43.75	2	131160	1	1		49907	Tubulin beta-2A chain OS=Homo sapiens GN=TUBB2A PE=1 SV=1
Q9BVA1	43.75	2	131160	1	1		49953	Tubulin beta-2B chain OS=Homo sapiens GN=TUBB2B PE=1 SV=1
P68371	43.75	2	131160	1	1		49831	Tubulin beta-4B chain OS=Homo sapiens GN=TUBB4B PE=1 SV=1
R4GN98	42.94	9	663610	1	1		9681	Protein S100 (Fragment) OS=Homo sapiens GN=S100A6 PE=1 SV=1
P06703	42.94	9	663610	1	1		10180	Protein S100-A6 OS=Homo sapiens GN=S100A6 PE=1 SV=1
P00558	42.56	2	40835	1	1	Carbamidomethylation	44615	Phosphoglycerate kinase 1 OS=Homo sapiens GN=PGK1 PE=1 SV=3
P63313	41.44	30	58244	1	1		5026	Thymosin beta-10 OS=Homo sapiens GN=TMSB10 PE=1 SV=2
A0A087WU59	38.25	18	207210	1	1		9292	Protocadherin gamma-C4 (Fragment) OS=Homo sapiens GN=PCDHGC4 PE=1 SV=1
Q9Y5F7	38.25	2	207210	1	1		101214	Protocadherin gamma-C4 OS=Homo sapiens GN=PCDHGC4 PE=2 SV=1
Q09666	37.74	0	29132	1	1		629114	Neuroblast differentiation-associated protein AHNAK OS=Homo sapiens GN=AHNAK PE=1 SV=2
P62937	35.91	5	73161	1	1		18012	Peptidyl-prolyl cis-trans isomerase A OS=Homo sapiens GN=PPIA PE=1 SV=2
F8WE65	35.91	8	73161	1	1		13022	Peptidyl-prolyl cis-trans isomerase OS=Homo sapiens GN=PPIA PE=1 SV=1
C9J5S7	35.91	7	73161	1	1		13208	Peptidyl-prolyl cis-trans isomerase OS=Homo sapiens GN=PPIA PE=1 SV=1

## Sheet: 10000 cells
Accession	-10lgP	Coverage (%)	Area	#Peptides	#Unique	PTM	Avg. Mass	Description
P06733	381.32	43	25304000	19	19	Carbamidomethylation; Deamidation (NQ); Carbamidomethylation (DHKE X@N-term)	47169	Alpha-enolase OS=Homo sapiens GN=ENO1 PE=1 SV=2
P06702	398.76	91	157300000	18	18	Oxidation (M); Deamidation (NQ); Oxidation (HW); Carbamidomethylation (DHKE X@N-term); Propionaldehyde +40; 4 more	13242	Protein S100-A9 OS=Homo sapiens GN=S100A9 PE=1 SV=1
P16401	378.32	54	53733000	21	17	Phosphorylation (STY); Acetylation (Protein N-term); Carbamylation; Deamidation (NQ); Carbamidomethylation (DHKE X@N-term); Carboxymethyl (KW X@N-term)	22580	Histone H1.5 OS=Homo sapiens GN=HIST1H1B PE=1 SV=3
P05109	345.94	77	88114000	16	16	Carbamidomethylation; Oxidation (M); Deamidation (NQ); Oxidation (HW); Carbamidomethylation (DHKE X@N-term); 2 more	10835	Protein S100-A8 OS=Homo sapiens GN=S100A8 PE=1 SV=1
P14618	347.32	39	16051000	15	15	Carbamidomethylation; Deamidation (NQ); Pyro-glu from Q; Carbamidomethylation (DHKE X@N-term)	57937	Pyruvate kinase PKM OS=Homo sapiens GN=PKM PE=1 SV=4
P61626	385.3	74	64983000	13	13	Carbamidomethylation; Oxidation (M); Deamidation (NQ); Carbamidomethylation (DHKE X@N-term); Iodination	16537	Lysozyme C OS=Homo sapiens GN=LYZ PE=1 SV=1
H0YMD0	318.18	57	8596600	13	13	Carbamidomethylation; Acetylation (Protein N-term); Deamidation (NQ)	25342	Annexin (Fragment) OS=Homo sapiens GN=ANXA2 PE=1 SV=1
H0YMU9	318.18	56	8596600	13	13	Carbamidomethylation; Acetylation (Protein N-term); Deamidation (NQ)	25569	Annexin OS=Homo sapiens GN=ANXA2 PE=1 SV=1
H0YN42	318.18	50	8596600	13	13	Carbamidomethylation; Acetylation (Protein N-term); Deamidation (NQ)	28825	Annexin (Fragment) OS=Homo sapiens GN=ANXA2 PE=1 SV=1
P07355	318.18	38	8596600	13	13	Carbamidomethylation; Acetylation (Protein N-term); Deamidation (NQ)	38604	Annexin A2 OS=Homo sapiens GN=ANXA2 PE=1 SV=2
Q5HY54	277.97	6	7875400	13	13	Carbamidomethylation	276548	Filamin-A OS=Homo sapiens GN=FLNA PE=1 SV=1
Q60FE5	277.97	6	7875400	13	13	Carbamidomethylation	278224	Filamin A OS=Homo sapiens GN=FLNA PE=1 SV=1
P21333	277.97	6	7875400	13	13	Carbamidomethylation	280737	Filamin-A OS=Homo sapiens GN=FLNA PE=1 SV=4
P62805	274.57	84	76356000	13	13	Biotinylation; Dimethylation(KR); Carbamidomethylation (DHKE X@N-term)	11367	Histone H4 OS=Homo sapiens GN=HIST1H4A PE=1 SV=2
P05164	297.37	16	9887600	12	12	Carbamidomethylation; Deamidation (NQ); Pyro-glu from Q; Deamidation (R)	83869	Myeloperoxidase OS=Homo sapiens GN=MPO PE=1 SV=1
P62328	307.61	100	80172000	9	9	Oxidation (M); Acetylation (K); Acetylation (Protein N-term); Carbamylation; Carbamidomethylation (DHKE X@N-term); Proline oxidation to pyrrolidinone	5053	Thymosin beta-4 OS=Homo sapiens GN=TMSB4X PE=1 SV=2
P62937	259.62	65	19204000	9	9	Carbamidomethylation; Acetylation (Protein N-term); Carbamidomethylation (DHKE X@N-term); Aminoethylcysteine	18012	Peptidyl-prolyl cis-trans isomerase A OS=Homo sapiens GN=PPIA PE=1 SV=2
P35579	252.96	6	5092200	9	9		226530	Myosin-9 OS=Homo sapiens GN=MYH9 PE=1 SV=4
A0A0B4J1R6	248.84	25	12328000	9	9	Carbamidomethylation (DHKE X@N-term)	49910	Transketolase OS=Homo sapiens GN=TKT PE=1 SV=1
P29401	248.84	18	12328000	9	9	Carbamidomethylation (DHKE X@N-term)	67878	Transketolase OS=Homo sapiens GN=TKT PE=1 SV=3
P04075	281.69	29	9596800	8	8	Carbamidomethylation; Deamidation (NQ); Carbamidomethylation (DHKE X@N-term)	39420	Fructose-bisphosphate aldolase A OS=Homo sapiens GN=ALDOA PE=1 SV=2
P04406	236.1	21	14342000	7	7	Deamidation (NQ); Carbamidomethylation (DHKE X@N-term)	36053	Glyceraldehyde-3-phosphate dehydrogenase OS=Homo sapiens GN=GAPDH PE=1 SV=3
P04083	230.8	25	6760300	7	7	Acetylation (Protein N-term)	38714	Annexin A1 OS=Homo sapiens GN=ANXA1 PE=1 SV=2
P81605	219.92	54	6154900	7	7		11284	Dermcidin OS=Homo sapiens GN=DCD PE=1 SV=2
P08246	261.57	32	2893900	6	6	Carbamidomethylation; Deamidation (NQ)	28518	Neutrophil elastase OS=Homo sapiens GN=ELANE PE=1 SV=1
P31146	236.74	15	5791000	6	6	Deamidation (NQ)	51026	Coronin-1A OS=Homo sapiens GN=CORO1A PE=1 SV=4
P18669	221.78	24	4955600	6	6	Carbamidomethylation; Deamidation (NQ)	28804	Phosphoglycerate mutase 1 OS=Homo sapiens GN=PGAM1 PE=1 SV=2
A0A087WWU8	204.96	31	6108200	6	6	Oxidation (M); Acetylation (Protein N-term)	26421	Tropomyosin alpha-3 chain OS=Homo sapiens GN=TPM3 PE=1 SV=1
Q5HYB6	204.96	30	6108200	6	6	Oxidation (M); Acetylation (Protein N-term)	27176	Epididymis luminal protein 189 OS=Homo sapiens GN=DKFZp686J1372 PE=1 SV=1
P09651	202.16	29	6684900	6	6	Acetylation (Protein N-term); Dimethylation(KR); Carbamidomethylation (DHKE X@N-term)	38747	Heterogeneous nuclear ribonucleoprotein A1 OS=Homo sapiens GN=HNRNPA1 PE=1 SV=5
P31949	199.78	56	2292500	6	6	Carbamidomethylation	11740	Protein S100-A11 OS=Homo sapiens GN=S100A11 PE=1 SV=2
P22626	240	21	5232300	5	5		37430	Heterogeneous nuclear ribonucleoproteins A2/B1 OS=Homo sapiens GN=HNRNPA2B1 PE=1 SV=2
P04040	237.99	16	2837700	5	5	Acetylation (Protein N-term)	59756	Catalase OS=Homo sapiens GN=CAT PE=1 SV=3
P00558	206.09	17	3259400	5	5	Carbamidomethylation	44615	Phosphoglycerate kinase 1 OS=Homo sapiens GN=PGK1 PE=1 SV=3
P23528	203.6	44	3864800	5	5	Oxidation (M); Acetylation (Protein N-term); Deamidation (NQ)	18502	Cofilin-1 OS=Homo sapiens GN=CFL1 PE=1 SV=3
P60174	202.8	25	2962900	5	5	Carbamidomethylation	30791	Triosephosphate isomerase OS=Homo sapiens GN=TPI1 PE=1 SV=3
K7EK77	199.18	27	3940400	5	5		22200	ATP synthase subunit alpha mitochondrial (Fragment) OS=Homo sapiens GN=ATP5A1 PE=1 SV=1
P25705	199.18	10	3940400	5	5		59751	ATP synthase subunit alpha mitochondrial OS=Homo sapiens GN=ATP5A1 PE=1 SV=1
K7EJP1	199.18	39	3940400	5	5		15268	ATP synthase subunit alpha mitochondrial (Fragment) OS=Homo sapiens GN=ATP5A1 PE=1 SV=8
K7ERX7	199.18	27	3940400	5	5		21590	ATP synthase subunit alpha mitochondrial (Fragment) OS=Homo sapiens GN=ATP5A1 PE=1 SV=1
Q5VTE0	177.12	8	4456700	5	5	Pyro-glu from Q	50185	Putative elongation factor 1-alpha-like 3 OS=Homo sapiens GN=EEF1A1P5 PE=5 SV=1
P68104	177.12	8	4456700	5	5	Pyro-glu from Q	50141	Elongation factor 1-alpha 1 OS=Homo sapiens GN=EEF1A1 PE=1 SV=1
A0A087WVQ9	177.12	9	4456700	5	5	Pyro-glu from Q	47883	Elongation factor 1-alpha 1 OS=Homo sapiens GN=EEF1A1 PE=1 SV=1
P13796	175.65	10	5817500	5	5		70289	Plastin-2 OS=Homo sapiens GN=LCP1 PE=1 SV=6
P16403	343.55	40	21514000	16	4	Acetylation (Protein N-term); Deamidation (NQ); Dimethylation(KR); Methylation(KR); Carbamidomethylation (DHKE X@N-term); Carboxymethyl (KW X@N-term)	21365	Histone H1.2 OS=Homo sapiens GN=HIST1H1C PE=1 SV=2
F5H3P3	280.83	33	5312000	4	4	Acetylation (Protein N-term)	17837	Rho GDP-dissociation inhibitor 2 (Fragment) OS=Homo sapiens GN=ARHGDIB PE=1 SV=8
P52566	280.83	26	5312000	4	4	Acetylation (Protein N-term)	22988	Rho GDP-dissociation inhibitor 2 OS=Homo sapiens GN=ARHGDIB PE=1 SV=3
P07737	198.14	44	8482400	4	4	Deamidation (NQ); Carbamidomethylation (DHKE X@N-term)	15054	Profilin-1 OS=Homo sapiens GN=PFN1 PE=1 SV=2
P30101	186.25	9	1545700	4	4		56782	Protein disulfide-isomerase A3 OS=Homo sapiens GN=PDIA3 PE=1 SV=4
Q86YZ3	179.85	3	2521600	4	4	Carbamidomethylation (DHKE X@N-term)	282389	Hornerin OS=Homo sapiens GN=HRNR PE=1 SV=2
Q9ULZ3	172.45	28	799100	4	4		21627	Apoptosis-associated speck-like protein containing a CARD OS=Homo sapiens GN=PYCARD PE=1 SV=2
P41218	163.59	11	1313200	4	4	Carbamidomethylation; 4-hydroxynonenal (HNE)	45836	Myeloid cell nuclear differentiation antigen OS=Homo sapiens GN=MNDA PE=1 SV=1
P37837	144.07	11	2402800	4	4		37540	Transaldolase OS=Homo sapiens GN=TALDO1 PE=1 SV=2
P08670	462.2	64	8983900	31	3	Carbamidomethylation; Phosphorylation (STY); Oxidation (M); Deamidation (NQ); Dehydration; 2 more	53652	Vimentin OS=Homo sapiens GN=VIM PE=1 SV=4
P10412	356.92	39	29755000	16	3	Acetylation (Protein N-term); Deamidation (NQ); Methylation(KR); Carbamidomethylation (DHKE X@N-term); Carboxymethyl (KW X@N-term)	21865	Histone H1.4 OS=Homo sapiens GN=HIST1H1E PE=1 SV=2
Q5JP53	299.42	27	1023500	7	3	Oxidation (M); Deamidation (NQ)	47767	Tubulin beta chain OS=Homo sapiens GN=TUBB PE=1 SV=1
P07437	299.42	25	1023500	7	3	Oxidation (M); Deamidation (NQ)	49671	Tubulin beta chain OS=Homo sapiens GN=TUBB PE=1 SV=2
F5H2R5	280.83	48	5244800	3	3	Acetylation (Protein N-term)	9792	Rho GDP-dissociation inhibitor 2 (Fragment) OS=Homo sapiens GN=ARHGDIB PE=1 SV=1
F5H6Q0	280.83	38	5244800	3	3	Acetylation (Protein N-term)	12530	Rho GDP-dissociation inhibitor 2 (Fragment) OS=Homo sapiens GN=ARHGDIB PE=1 SV=1
Q562R1	261.93	26	12927000	11	3	Carbamidomethylation; Oxidation (M); Deamidation (NQ); Oxidation or Hydroxylation; Beta-methylthiolation (ND)	42003	Beta-actin-like protein 2 OS=Homo sapiens GN=ACTBL2 PE=1 SV=2
Q6FI13	254.22	55	2013600	6	3	Deamidation (NQ); Sodium adduct; Carbamidomethylation (DHKE X@N-term); Fluorination; Deoxy	14095	Histone H2A type 2-A OS=Homo sapiens GN=HIST2H2AA3 PE=1 SV=3
F8W1R7	237.59	30	2595300	3	3	Carbamidomethylation; Acetylation (Protein N-term)	16290	Myosin light polypeptide 6 OS=Homo sapiens GN=MYL6 PE=1 SV=1
P60660	237.59	29	2595300	3	3	Carbamidomethylation; Acetylation (Protein N-term)	16930	Myosin light polypeptide 6 OS=Homo sapiens GN=MYL6 PE=1 SV=2
G3V1V0	237.59	27	2595300	3	3	Carbamidomethylation; Acetylation (Protein N-term)	18037	Myosin light polypeptide 6 OS=Homo sapiens GN=MYL6 PE=1 SV=1
P0DMV8	187	7	279950	4	3	Pyro-glu from Q	70052	Heat shock 70 kDa protein 1A OS=Homo sapiens GN=HSPA1A PE=1 SV=1
P0DMV9	187	7	279950	4	3	Pyro-glu from Q	70052	Heat shock 70 kDa protein 1B OS=Homo sapiens GN=HSPA1B PE=1 SV=1
A0A0G2JIW1	187	7	279950	4	3	Pyro-glu from Q	70109	Heat shock 70 kDa protein 1B OS=Homo sapiens GN=HSPA1B PE=1 SV=1
P09382	184.99	32	5416000	3	3	Carbamidomethylation; Acetylation (Protein N-term); Deamidation (NQ); Carbamidomethylation (DHKE X@N-term)	14716	Galectin-1 OS=Homo sapiens GN=LGALS1 PE=1 SV=2
P20700	181.82	9	1230200	3	3	Acetylation (Protein N-term)	66408	Lamin-B1 OS=Homo sapiens GN=LMNB1 PE=1 SV=2
R4GN98	157.99	44	9651700	3	3	Carbamidomethylation; Acetylation (Protein N-term)	9681	Protein S100 (Fragment) OS=Homo sapiens GN=S100A6 PE=1 SV=1
P06703	157.99	41	9651700	3	3	Carbamidomethylation; Acetylation (Protein N-term)	10180	Protein S100-A6 OS=Homo sapiens GN=S100A6 PE=1 SV=1
E9PKE3	148.74	7	985080	4	3	Carbamidomethylation	68806	Heat shock cognate 71 kDa protein OS=Homo sapiens GN=HSPA8 PE=1 SV=1
P11142	148.74	6	985080	4	3	Carbamidomethylation	70898	Heat shock cognate 71 kDa protein OS=Homo sapiens GN=HSPA8 PE=1 SV=1
P09211	140.35	20	509170	3	3	Carbamidomethylation; Carbamidomethylation (DHKE X@N-term)	23356	Glutathione S-transferase P OS=Homo sapiens GN=GSTP1 PE=1 SV=2
E9PHT9	140.29	23	2208400	3	3		18224	Annexin OS=Homo sapiens GN=ANXA5 PE=1 SV=1
P08758	140.29	12	2208400	3	3		35937	Annexin A5 OS=Homo sapiens GN=ANXA5 PE=1 SV=2
O00299	134.41	16	906820	3	3	Acetylation (Protein N-term)	26923	Chloride intracellular channel protein 1 OS=Homo sapiens GN=CLIC1 PE=1 SV=4
Q5T6W2	129.6	11	323280	3	3	Carbamidomethylation	41807	Heterogeneous nuclear ribonucleoprotein K (Fragment) OS=Homo sapiens GN=HNRNPK PE=1 SV=1
P61978	129.6	9	323280	3	3	Carbamidomethylation	50976	Heterogeneous nuclear ribonucleoprotein K OS=Homo sapiens GN=HNRNPK PE=1 SV=1
A0A0A0MRQ5	127.35	31	2199500	3	3	Pyro-glu from Q	10676	Peroxiredoxin-1 OS=Homo sapiens GN=PRDX1 PE=1 SV=1
A0A0A0MSI0	127.35	18	2199500	3	3	Pyro-glu from Q	18976	Peroxiredoxin-1 (Fragment) OS=Homo sapiens GN=PRDX1 PE=1 SV=1
Q06830	127.35	15	2199500	3	3	Pyro-glu from Q	22110	Peroxiredoxin-1 OS=Homo sapiens GN=PRDX1 PE=1 SV=1
P31944	119.4	11	850570	3	3		27680	Caspase-14 OS=Homo sapiens GN=CASP14 PE=1 SV=2
P26447	110.31	18	5994600	3	3	Carbamidomethylation (DHKE X@N-term)	11729	Protein S100-A4 OS=Homo sapiens GN=S100A4 PE=1 SV=1
P08311	108.79	11	5719200	3	3		28837	Cathepsin G OS=Homo sapiens GN=CTSG PE=1 SV=2
P16402	327.84	39	2279500	15	2	Acetylation (Protein N-term); Deamidation (NQ); Methylation(KR); Carbamidomethylation (DHKE X@N-term); Carboxymethyl (KW X@N-term)	22350	Histone H1.3 OS=Homo sapiens GN=HIST1H1D PE=1 SV=2
P68371	282.06	22	609650	6	2	Oxidation (M); Deamidation (NQ)	49831	Tubulin beta-4B chain OS=Homo sapiens GN=TUBB4B PE=1 SV=1
P26038	177.72	8	681440	4	2	Oxidation (M)	67820	Moesin OS=Homo sapiens GN=MSN PE=1 SV=3
F8VQQ4	177.52	16	459860	2	2	Deamidation (NQ); Pyro-glu from Q	24221	Tubulin alpha chain (Fragment) OS=Homo sapiens GN=TUBA1A PE=1 SV=1
Q9BQE3	177.52	8	459860	2	2	Deamidation (NQ); Pyro-glu from Q	49895	Tubulin alpha-1C chain OS=Homo sapiens GN=TUBA1C PE=1 SV=1
Q71U36	177.52	8	459860	2	2	Deamidation (NQ); Pyro-glu from Q	50136	Tubulin alpha-1A chain OS=Homo sapiens GN=TUBA1A PE=1 SV=1
P68363	177.52	8	459860	2	2	Deamidation (NQ); Pyro-glu from Q	50152	Tubulin alpha-1B chain OS=Homo sapiens GN=TUBA1B PE=1 SV=1
F5H5D3	177.52	7	459860	2	2	Deamidation (NQ); Pyro-glu from Q	57730	Tubulin alpha chain OS=Homo sapiens GN=TUBA1C PE=1 SV=1
F8VVB9	177.52	15	459860	2	2	Deamidation (NQ); Pyro-glu from Q	27465	Tubulin alpha-1B chain (Fragment) OS=Homo sapiens GN=TUBA1B PE=1 SV=8
F8VX09	177.52	48	459860	2	2	Deamidation (NQ); Pyro-glu from Q	8288	Tubulin alpha-1B chain (Fragment) OS=Homo sapiens GN=TUBA1B PE=1 SV=1
F8VWV9	177.52	44	459860	2	2	Deamidation (NQ); Pyro-glu from Q	8944	Tubulin alpha-1B chain (Fragment) OS=Homo sapiens GN=TUBA1B PE=1 SV=1
F8VRZ4	177.52	32	459860	2	2	Deamidation (NQ); Pyro-glu from Q	12220	Tubulin alpha-1A chain (Fragment) OS=Homo sapiens GN=TUBA1A PE=3 SV=1
F8VS66	177.52	28	459860	2	2	Deamidation (NQ); Pyro-glu from Q	14401	Tubulin alpha-1C chain OS=Homo sapiens GN=TUBA1C PE=4 SV=1
P09429	168.05	18	1565800	4	2		24894	High mobility group protein B1 OS=Homo sapiens GN=HMGB1 PE=1 SV=3
P80511	154.36	32	2455000	2	2	Deamidation (NQ)	10575	Protein S100-A12 OS=Homo sapiens GN=S100A12 PE=1 SV=2
P11021	149	6	761130	3	2		72333	78 kDa glucose-regulated protein OS=Homo sapiens GN=HSPA5 PE=1 SV=2
J3KRE2	148.18	36	826640	2	2	Acetylation (Protein N-term)	14814	Rho GDP-dissociation inhibitor 1 OS=Homo sapiens GN=ARHGDIA PE=1 SV=1
J3KTF8	148.18	24	826640	2	2	Acetylation (Protein N-term)	21517	Rho GDP-dissociation inhibitor 1 (Fragment) OS=Homo sapiens GN=ARHGDIA PE=1 SV=8
P52565	148.18	23	826640	2	2	Acetylation (Protein N-term)	23207	Rho GDP-dissociation inhibitor 1 OS=Homo sapiens GN=ARHGDIA PE=1 SV=3
J3QQX2	148.18	20	826640	2	2	Acetylation (Protein N-term)	25831	Rho GDP-dissociation inhibitor 1 OS=Homo sapiens GN=ARHGDIA PE=1 SV=1
P06576	141.03	7	937750	2	2	Oxidation (M)	56560	ATP synthase subunit beta mitochondrial OS=Homo sapiens GN=ATP5B PE=1 SV=3
Q5T123	135.78	33	7923400	2	2	Oxidation (M)	9381	SH3 domain-binding glutamic acid-rich-like protein 3 OS=Homo sapiens GN=SH3BGRL3 PE=1 SV=1
Q9H299	135.78	31	7923400	2	2	Oxidation (M)	10438	SH3 domain-binding glutamic acid-rich-like protein 3 OS=Homo sapiens GN=SH3BGRL3 PE=1 SV=1
U3KPS2	135.4	8	2008300	2	2		23611	Myeloblastin OS=Homo sapiens GN=PRTN3 PE=1 SV=1
P24158	135.4	7	2008300	2	2		27807	Myeloblastin OS=Homo sapiens GN=PRTN3 PE=1 SV=3
B1AH77	133.9	28	1375400	4	2	Carbamidomethylation	16775	Ras-related C3 botulinum toxin substrate 2 OS=Homo sapiens GN=RAC2 PE=1 SV=1
B1AH80	133.9	22	1375400	4	2	Carbamidomethylation	20799	Ras-related C3 botulinum toxin substrate 2 OS=Homo sapiens GN=RAC2 PE=1 SV=1
P15153	133.9	21	1375400	4	2	Carbamidomethylation	21429	Ras-related C3 botulinum toxin substrate 2 OS=Homo sapiens GN=RAC2 PE=1 SV=1
A2A2D0	133.36	31	1959900	2	2	Acetylation (Protein N-term); Carbamidomethylation (DHKE X@N-term)	9793	Stathmin (Fragment) OS=Homo sapiens GN=STMN1 PE=1 SV=8
P16949	133.36	17	1959900	2	2	Acetylation (Protein N-term); Carbamidomethylation (DHKE X@N-term)	17302	Stathmin OS=Homo sapiens GN=STMN1 PE=1 SV=3
G3V213	130.93	25	1317700	2	2		14325	Adenylate kinase 2 isoform CRA_a OS=Homo sapiens GN=AK2 PE=1 SV=1
F8VZG5	130.93	20	1317700	2	2		17499	Adenylate kinase 2 mitochondrial OS=Homo sapiens GN=AK2 PE=1 SV=1
F8W1A4	130.93	14	1317700	2	2		25631	Adenylate kinase 2 mitochondrial OS=Homo sapiens GN=AK2 PE=1 SV=1
P54819	130.93	14	1317700	2	2		26478	Adenylate kinase 2 mitochondrial OS=Homo sapiens GN=AK2 PE=1 SV=2
P19338	128.88	5	480490	2	2		76615	Nucleolin OS=Homo sapiens GN=NCL PE=1 SV=3
P40121	128.73	8	2113300	2	2	Pyro-glu from Q	38499	Macrophage-capping protein OS=Homo sapiens GN=CAPG PE=1 SV=2
A0A087X2D0	128.34	37	1321600	2	2		10321	Serine/arginine-rich-splicing factor 3 OS=Homo sapiens GN=SRSF3 PE=1 SV=1
P84103	128.34	21	1321600	2	2		19330	Serine/arginine-rich splicing factor 3 OS=Homo sapiens GN=SRSF3 PE=1 SV=1
P10809	126.52	5	538170	2	2	Carbamidomethylation	61055	60 kDa heat shock protein mitochondrial OS=Homo sapiens GN=HSPD1 PE=1 SV=2
Q96C19	125.69	10	921060	2	2	Acetylation (Protein N-term)	26697	EF-hand domain-containing protein D2 OS=Homo sapiens GN=EFHD2 PE=1 SV=1
K7EMN2	125.25	16	992070	2	2		17293	6-phosphogluconate dehydrogenase decarboxylating (Fragment) OS=Homo sapiens GN=PGD PE=1 SV=1
K7EM49	125.25	13	992070	2	2		22258	6-phosphogluconate dehydrogenase decarboxylating (Fragment) OS=Homo sapiens GN=PGD PE=1 SV=1
K7EPF6	125.25	10	992070	2	2		27884	6-phosphogluconate dehydrogenase decarboxylating (Fragment) OS=Homo sapiens GN=PGD PE=1 SV=1
P52209	125.25	5	992070	2	2		53140	6-phosphogluconate dehydrogenase decarboxylating OS=Homo sapiens GN=PGD PE=1 SV=3
P62263	123.32	11	697320	2	2		16273	40S ribosomal protein S14 OS=Homo sapiens GN=RPS14 PE=1 SV=3
P13498	123.13	13	1145200	2	2		21013	Cytochrome b-245 light chain OS=Homo sapiens GN=CYBA PE=1 SV=3
Q01518	120.46	6	1904100	2	2	Carbamidomethylation; Phosphorylation (STY)	51902	Adenylyl cyclase-associated protein 1 OS=Homo sapiens GN=CAP1 PE=1 SV=5
H0YJW3	118.59	10	769860	2	2	Carbamidomethylation	28881	Alpha-actinin-1 (Fragment) OS=Homo sapiens GN=ACTN1 PE=1 SV=1
H7C144	118.59	7	769860	2	2	Carbamidomethylation	39002	Alpha-actinin-4 (Fragment) OS=Homo sapiens GN=ACTN4 PE=1 SV=1
F5GXS2	118.59	5	769860	2	2	Carbamidomethylation	59564	Alpha-actinin-4 OS=Homo sapiens GN=ACTN4 PE=1 SV=2
H9KV75	118.59	3	769860	2	2	Carbamidomethylation	94826	Alpha-actinin-1 OS=Homo sapiens GN=ACTN1 PE=1 SV=1
P12814	118.59	3	769860	2	2	Carbamidomethylation	103058	Alpha-actinin-1 OS=Homo sapiens GN=ACTN1 PE=1 SV=2
O43707	118.59	3	769860	2	2	Carbamidomethylation	104854	Alpha-actinin-4 OS=Homo sapiens GN=ACTN4 PE=1 SV=2
B7Z645	111.98	4	725780	2	2		52046	Heterogeneous nuclear ribonucleoprotein Q OS=Homo sapiens GN=SYNCRIP PE=1 SV=1
O60506	111.98	3	725780	2	2		69603	Heterogeneous nuclear ribonucleoprotein Q OS=Homo sapiens GN=SYNCRIP PE=1 SV=2
O43390	111.98	3	725780	2	2		70943	Heterogeneous nuclear ribonucleoprotein R OS=Homo sapiens GN=HNRNPR PE=1 SV=1
P30040	110.3	8	383870	2	2		28993	Endoplasmic reticulum resident protein 29 OS=Homo sapiens GN=ERP29 PE=1 SV=4
A0A087X0X3	106.01	3	399220	2	2		77570	Heterogeneous nuclear ribonucleoprotein M OS=Homo sapiens GN=HNRNPM PE=1 SV=1
P52272	106.01	3	399220	2	2		77516	Heterogeneous nuclear ribonucleoprotein M OS=Homo sapiens GN=HNRNPM PE=1 SV=3
P33241	99.41	7	1713300	2	2		37192	Lymphocyte-specific protein 1 OS=Homo sapiens GN=LSP1 PE=1 SV=1
E9PBD8	99.41	11	1713300	2	2		24406	Lymphocyte-specific protein 1 (Fragment) OS=Homo sapiens GN=LSP1 PE=1 SV=1
E7EMG9	99.41	9	1713300	2	2		30613	Lymphocyte-specific protein 1 (Fragment) OS=Homo sapiens GN=LSP1 PE=1 SV=1
Q15365	98.79	7	529620	2	2	Carbamidomethylation	37498	Poly(rC)-binding protein 1 OS=Homo sapiens GN=PCBP1 PE=1 SV=2
P05107	97.22	2	1245700	2	2	Carbamidomethylation	84782	Integrin beta-2 OS=Homo sapiens GN=ITGB2 PE=1 SV=2
G3V555	93.31	12	1906900	2	2		19178	Heterogeneous nuclear ribonucleoproteins C1/C2 (Fragment) OS=Homo sapiens GN=HNRNPC PE=1 SV=1
G3V575	93.31	11	1906900	2	2		20366	Heterogeneous nuclear ribonucleoproteins C1/C2 (Fragment) OS=Homo sapiens GN=HNRNPC PE=1 SV=1
G3V576	93.31	9	1906900	2	2		25257	Heterogeneous nuclear ribonucleoproteins C1/C2 OS=Homo sapiens GN=HNRNPC PE=1 SV=1
G3V4W0	93.31	8	1906900	2	2		28916	Heterogeneous nuclear ribonucleoproteins C1/C2 (Fragment) OS=Homo sapiens GN=HNRNPC PE=1 SV=1
B4DY08	93.31	7	1906900	2	2		31972	Heterogeneous nuclear ribonucleoproteins C1/C2 OS=Homo sapiens GN=HNRNPC PE=1 SV=1
B2R5W2	93.31	7	1906900	2	2		31948	Heterogeneous nuclear ribonucleoproteins C1/C2 OS=Homo sapiens GN=HNRNPC PE=1 SV=1
G3V4C1	93.31	7	1906900	2	2		32238	Heterogeneous nuclear ribonucleoproteins C1/C2 OS=Homo sapiens GN=HNRNPC PE=1 SV=1
G3V2Q1	93.31	7	1906900	2	2		33571	Heterogeneous nuclear ribonucleoproteins C1/C2 OS=Homo sapiens GN=HNRNPC PE=1 SV=1
P07910	93.31	7	1906900	2	2		33670	Heterogeneous nuclear ribonucleoproteins C1/C2 OS=Homo sapiens GN=HNRNPC PE=1 SV=4
P62851	91.63	15	632620	2	2		13742	40S ribosomal protein S25 OS=Homo sapiens GN=RPS25 PE=1 SV=1
P07195	90.05	8	1216100	2	2	Carbamidomethylation	36639	L-lactate dehydrogenase B chain OS=Homo sapiens GN=LDHB PE=1 SV=2
Q92882	82.19	9	322410	2	2		23787	Osteoclast-stimulating factor 1 OS=Homo sapiens GN=OSTF1 PE=1 SV=2
Q9Y490	81.45	1	1038600	2	2		269765	Talin-1 OS=Homo sapiens GN=TLN1 PE=1 SV=3
P59998	81.27	13	585090	2	2	Acetylation (Protein N-term)	19667	Actin-related protein 2/3 complex subunit 4 OS=Homo sapiens GN=ARPC4 PE=1 SV=3
A0A140TA02	80.51	9	149050	2	2	Carbamidomethylation	25660	HLA class I histocompatibility antigen B-46 alpha chain OS=Homo sapiens GN=HLA-B PE=1 SV=1
A0A140TA21	80.51	9	149050	2	2	Carbamidomethylation	25744	HLA class I histocompatibility antigen B-46 alpha chain OS=Homo sapiens GN=HLA-B PE=1 SV=1
A0A140TA05	80.51	9	149050	2	2	Carbamidomethylation	25640	HLA class I histocompatibility antigen Cw-6 alpha chain OS=Homo sapiens GN=HLA-C PE=1 SV=1
A0A140T9D4	80.51	9	149050	2	2	Carbamidomethylation	27691	HLA class I histocompatibility antigen B-46 alpha chain (Fragment) OS=Homo sapiens GN=HLA-B PE=1 SV=1
A0A140T942	80.51	8	149050	2	2	Carbamidomethylation	29969	HLA class I histocompatibility antigen Cw-6 alpha chain (Fragment) OS=Homo sapiens GN=HLA-C PE=1 SV=1
A0A140T9M5	80.51	8	149050	2	2	Carbamidomethylation	29747	HLA class I histocompatibility antigen Cw-6 alpha chain (Fragment) OS=Homo sapiens GN=HLA-C PE=1 SV=1
A0A140T9E1	80.51	8	149050	2	2	Carbamidomethylation	29553	HLA class I histocompatibility antigen Cw-6 alpha chain (Fragment) OS=Homo sapiens GN=HLA-C PE=1 SV=1
A0A140T9L3	80.51	8	149050	2	2	Carbamidomethylation	29615	HLA class I histocompatibility antigen Cw-6 alpha chain (Fragment) OS=Homo sapiens GN=HLA-C PE=1 SV=1
A0A140T937	80.51	6	149050	2	2	Carbamidomethylation	38331	HLA class I histocompatibility antigen Cw-6 alpha chain OS=Homo sapiens GN=HLA-C PE=1 SV=1
P30460	80.51	6	149050	2	2	Carbamidomethylation	40331	HLA class I histocompatibility antigen B-8 alpha chain OS=Homo sapiens GN=HLA-B PE=1 SV=1
P30462	80.51	6	149050	2	2	Carbamidomethylation	40358	HLA class I histocompatibility antigen B-14 alpha chain OS=Homo sapiens GN=HLA-B PE=1 SV=1
Q29940	80.51	6	149050	2	2	Carbamidomethylation	40584	HLA class I histocompatibility antigen B-59 alpha chain OS=Homo sapiens GN=HLA-B PE=1 SV=1
P30508	80.51	6	149050	2	2	Carbamidomethylation	40886	HLA class I histocompatibility antigen Cw-12 alpha chain OS=Homo sapiens GN=HLA-C PE=1 SV=2
P30499	80.51	6	149050	2	2	Carbamidomethylation	40965	HLA class I histocompatibility antigen Cw-1 alpha chain OS=Homo sapiens GN=HLA-C PE=1 SV=1
O19617	80.51	6	149050	2	2	Carbamidomethylation	40711	HLA class I antigen OS=Homo sapiens GN=HLA-C PE=1 SV=1
Q29865	80.51	6	149050	2	2	Carbamidomethylation	40933	HLA class I histocompatibility antigen Cw-18 alpha chain OS=Homo sapiens GN=HLA-C PE=1 SV=1
P10321	80.51	6	149050	2	2	Carbamidomethylation	40649	HLA class I histocompatibility antigen Cw-7 alpha chain OS=Homo sapiens GN=HLA-C PE=1 SV=3
A0A140T921	80.51	6	149050	2	2	Carbamidomethylation	41206	HLA class I histocompatibility antigen Cw-6 alpha chain OS=Homo sapiens GN=HLA-C PE=1 SV=1
A0A140T962	80.51	6	149050	2	2	Carbamidomethylation	41525	HLA class I histocompatibility antigen Cw-6 alpha chain OS=Homo sapiens GN=HLA-C PE=1 SV=1
A0A140T9J9	80.51	6	149050	2	2	Carbamidomethylation	41622	HLA class I histocompatibility antigen Cw-6 alpha chain OS=Homo sapiens GN=HLA-C PE=1 SV=1
A2AEA2	80.51	6	149050	2	2	Carbamidomethylation	41301	HLA class I histocompatibility antigen Cw-6 alpha chain OS=Homo sapiens GN=HLA-C PE=1 SV=2
A0A140T912	80.51	6	149050	2	2	Carbamidomethylation	41466	HLA class I histocompatibility antigen Cw-6 alpha chain OS=Homo sapiens GN=HLA-C PE=1 SV=1
A0A140T9H5	80.51	6	149050	2	2	Carbamidomethylation	41363	HLA class I histocompatibility antigen Cw-6 alpha chain OS=Homo sapiens GN=HLA-C PE=1 SV=1
A0A140T930	80.51	5	149050	2	2	Carbamidomethylation	44433	HLA class I histocompatibility antigen Cw-6 alpha chain OS=Homo sapiens GN=HLA-C PE=1 SV=1
A0A140T9B3	80.51	5	149050	2	2	Carbamidomethylation	44588	HLA class I histocompatibility antigen Cw-6 alpha chain OS=Homo sapiens GN=HLA-C PE=1 SV=1
A0A140T9U8	80.51	5	149050	2	2	Carbamidomethylation	44216	HLA class I histocompatibility antigen Cw-6 alpha chain OS=Homo sapiens GN=HLA-C PE=1 SV=1
O43516	79.81	7	957910	2	2		51259	WAS/WASL-interacting protein family member 1 OS=Homo sapiens GN=WIPF1 PE=1 SV=3
Q8WZ42	61.3	0	17359000	2	2	Carbamidomethylation; Phosphorylation (STY)	3815922	Titin OS=Homo sapiens GN=TTN PE=1 SV=4
A0A0A0MTS7	61.3	0	17359000	2	2	Carbamidomethylation; Phosphorylation (STY)	3994536	Titin OS=Homo sapiens GN=TTN PE=1 SV=1
A0A0A0MRA3	61.3	0	17359000	2	2	Carbamidomethylation; Phosphorylation (STY)	3013943	Titin OS=Homo sapiens GN=TTN PE=1 SV=1
J3QL05	56.4	8	287550	2	2		15156	Serine/arginine-rich-splicing factor 2 (Fragment) OS=Homo sapiens GN=SRSF2 PE=1 SV=1
J3KP15	56.4	8	287550	2	2		15371	Serine/arginine-rich-splicing factor 2 (Fragment) OS=Homo sapiens GN=SRSF2 PE=1 SV=8
Q01130	56.4	5	287550	2	2		25476	Serine/arginine-rich splicing factor 2 OS=Homo sapiens GN=SRSF2 PE=1 SV=4
P60709	470.42	62	11444000	26	1	Carbamidomethylation; Oxidation (M); Acetylation (Protein N-term); Acetylation (N-term); Deamidation (NQ); 7 more	41737	Actin cytoplasmic 1 OS=Homo sapiens GN=ACTB PE=1 SV=1
P63261	465.92	62	1319100	26	1	Carbamidomethylation; Oxidation (M); Acetylation (Protein N-term); Acetylation (N-term); Deamidation (NQ); 7 more	41793	Actin cytoplasmic 2 OS=Homo sapiens GN=ACTG1 PE=1 SV=1
B0YJC4	451.53	64	876910	29	1	Carbamidomethylation; Phosphorylation (STY); Oxidation (M); Deamidation (NQ); Dehydration; 2 more	49653	Vimentin OS=Homo sapiens GN=VIM PE=1 SV=1
P68032	411.66	36	0	18	1	Oxidation (M); Deamidation (NQ); Methylation(KR); Ubiquitin; Carbamidomethylation (DHKE X@N-term); 2 more	42019	Actin alpha cardiac muscle 1 OS=Homo sapiens GN=ACTC1 PE=1 SV=1
P68133	411.66	36	0	18	1	Oxidation (M); Deamidation (NQ); Methylation(KR); Ubiquitin; Carbamidomethylation (DHKE X@N-term); 2 more	42051	Actin alpha skeletal muscle OS=Homo sapiens GN=ACTA1 PE=1 SV=1
Q7L7L0	332.05	56	233910	7	1	Amidation; Deamidation (NQ); Carbamidomethylation (DHKE X@N-term); Replacement of proton by potassium; Methylphosphonylation; 4 more	14121	Histone H2A type 3 OS=Homo sapiens GN=HIST3H2A PE=1 SV=3
P04908	332.05	56	233910	7	1	Amidation; Deamidation (NQ); Carbamidomethylation (DHKE X@N-term); Replacement of proton by potassium; Methylphosphonylation; 4 more	14135	Histone H2A type 1-B/E OS=Homo sapiens GN=HIST1H2AB PE=1 SV=2
Q93077	332.05	56	233910	7	1	Amidation; Deamidation (NQ); Carbamidomethylation (DHKE X@N-term); Replacement of proton by potassium; Methylphosphonylation; 4 more	14105	Histone H2A type 1-C OS=Homo sapiens GN=HIST1H2AC PE=1 SV=3
Q99879	303.44	72	86616	11	1	Oxidation (M); Acetylation (N-term); Carbamylation; Deamidation (NQ); Pyro-glu from Q; 2 more	13989	Histone H2B type 1-M OS=Homo sapiens GN=HIST1H2BM PE=1 SV=3
Q5TEC6	212.32	40	1842300	9	1	Dimethylation(KR); Methylation(KR); Carbamidomethylation (DHKE X@N-term)	15430	Histone H3 OS=Homo sapiens GN=HIST2H3PS2 PE=1 SV=1
P26583	152.02	13	1794300	3	1		24034	High mobility group protein B2 OS=Homo sapiens GN=HMGB2 PE=1 SV=2
E7EQR4	137.94	5	258840	3	1		69372	Ezrin OS=Homo sapiens GN=EZR PE=1 SV=3
P15311	137.94	5	258840	3	1		69413	Ezrin OS=Homo sapiens GN=EZR PE=1 SV=4
E5RIR4	127.31	31	1479300	2	1	Acetylation (Protein N-term); Deamidation (NQ); Methylation(KR)	8434	14-3-3 protein zeta/delta (Fragment) OS=Homo sapiens GN=YWHAZ PE=1 SV=1
E9PD24	127.31	25	1479300	2	1	Acetylation (Protein N-term); Deamidation (NQ); Methylation(KR)	10612	14-3-3 protein zeta/delta (Fragment) OS=Homo sapiens GN=YWHAZ PE=1 SV=1
E7EVZ2	127.31	23	1479300	2	1	Acetylation (Protein N-term); Deamidation (NQ); Methylation(KR)	11270	14-3-3 protein zeta/delta (Fragment) OS=Homo sapiens GN=YWHAZ PE=1 SV=1
E7ESK7	127.31	17	1479300	2	1	Acetylation (Protein N-term); Deamidation (NQ); Methylation(KR)	15697	14-3-3 protein zeta/delta (Fragment) OS=Homo sapiens GN=YWHAZ PE=1 SV=1
P63104	127.31	9	1479300	2	1	Acetylation (Protein N-term); Deamidation (NQ); Methylation(KR)	27745	14-3-3 protein zeta/delta OS=Homo sapiens GN=YWHAZ PE=1 SV=1
E7EX29	127.31	9	1479300	2	1	Acetylation (Protein N-term); Deamidation (NQ); Methylation(KR)	28037	14-3-3 protein zeta/delta (Fragment) OS=Homo sapiens GN=YWHAZ PE=1 SV=1
P23246	126.87	3	754790	2	1		76150	Splicing factor proline- and glutamine-rich OS=Homo sapiens GN=SFPQ PE=1 SV=2
Q04917	121.99	9	953430	2	1	Acetylation (Protein N-term)	28219	14-3-3 protein eta OS=Homo sapiens GN=YWHAH PE=1 SV=4
J3KSC4	117.47	20	190310	3	1	Carbamidomethylation	14831	Ras-related C3 botulinum toxin substrate 3 (Fragment) OS=Homo sapiens GN=RAC3 PE=1 SV=1
J3QLK0	117.47	19	190310	3	1	Carbamidomethylation	15412	Ras-related C3 botulinum toxin substrate 3 (Fragment) OS=Homo sapiens GN=RAC3 PE=1 SV=1
P63000	117.47	14	190310	3	1	Carbamidomethylation	21450	Ras-related C3 botulinum toxin substrate 1 OS=Homo sapiens GN=RAC1 PE=1 SV=1
P60763	117.47	14	190310	3	1	Carbamidomethylation	21379	Ras-related C3 botulinum toxin substrate 3 OS=Homo sapiens GN=RAC3 PE=1 SV=1
Q4VY20	116.35	32	61692	2	1	Acetylation (Protein N-term)	8428	14-3-3 protein beta/alpha (Fragment) OS=Homo sapiens GN=YWHAB PE=1 SV=1
Q4VY19	116.35	24	61692	2	1	Acetylation (Protein N-term)	11549	14-3-3 protein beta/alpha (Fragment) OS=Homo sapiens GN=YWHAB PE=1 SV=1
A0A0J9YWE8	116.35	16	61692	2	1	Acetylation (Protein N-term)	17410	14-3-3 protein beta/alpha OS=Homo sapiens GN=YWHAB PE=1 SV=1
P31946	116.35	10	61692	2	1	Acetylation (Protein N-term)	28082	14-3-3 protein beta/alpha OS=Homo sapiens GN=YWHAB PE=1 SV=3
P61981	113.98	9	844010	2	1	Acetylation (Protein N-term)	28303	14-3-3 protein gamma OS=Homo sapiens GN=YWHAG PE=1 SV=2
P17096	109.79	23	335750	1	1		11676	High mobility group protein HMG-I/HMG-Y OS=Homo sapiens GN=HMGA1 PE=1 SV=3
P0C0S5	106.86	31	100700	2	1		13553	Histone H2A.Z OS=Homo sapiens GN=H2AFZ PE=1 SV=2
Q71UI9	106.86	31	100700	2	1		13509	Histone H2A.V OS=Homo sapiens GN=H2AFV PE=1 SV=3
P20930	98.24	0	671210	1	1	Carbamidomethylation (DHKE X@N-term)	435180	Filaggrin OS=Homo sapiens GN=FLG PE=1 SV=3
Q5JR95	97.56	9	287890	1	1		21880	40S ribosomal protein S8 OS=Homo sapiens GN=RPS8 PE=1 SV=1
P62241	97.56	8	287890	1	1		24205	40S ribosomal protein S8 OS=Homo sapiens GN=RPS8 PE=1 SV=2
P08133	96.71	2	896960	1	1		75873	Annexin A6 OS=Homo sapiens GN=ANXA6 PE=1 SV=3
E5RK69	96.71	3	896960	1	1		51777	Annexin OS=Homo sapiens GN=ANXA6 PE=1 SV=1
P09467	96.02	5	0	1	1		36842	Fructose-1 6-bisphosphatase 1 OS=Homo sapiens GN=FBP1 PE=1 SV=5
Q15084	95.49	3	482090	1	1		48121	Protein disulfide-isomerase A6 OS=Homo sapiens GN=PDIA6 PE=1 SV=1
P08238	95.08	2	294690	1	1		83264	Heat shock protein HSP 90-beta OS=Homo sapiens GN=HSP90AB1 PE=1 SV=4
C9JGI3	94.67	3	357160	1	1		46087	Thymidine phosphorylase (Fragment) OS=Homo sapiens GN=TYMP PE=1 SV=1
P19971	94.67	3	357160	1	1		49956	Thymidine phosphorylase OS=Homo sapiens GN=TYMP PE=1 SV=2
Q15942	94.45	3	1011800	1	1		61277	Zyxin OS=Homo sapiens GN=ZYX PE=1 SV=1
M0QZN2	93.28	11	213040	1	1	Carbamidomethylation	14763	40S ribosomal protein S5 OS=Homo sapiens GN=RPS5 PE=1 SV=1
M0R0F0	93.28	8	213040	1	1	Carbamidomethylation	22391	40S ribosomal protein S5 (Fragment) OS=Homo sapiens GN=RPS5 PE=1 SV=1
P46782	93.28	7	213040	1	1	Carbamidomethylation	22876	40S ribosomal protein S5 OS=Homo sapiens GN=RPS5 PE=1 SV=4
M0R0R2	93.28	7	213040	1	1	Carbamidomethylation	25333	40S ribosomal protein S5 OS=Homo sapiens GN=RPS5 PE=1 SV=1
P11215	91.1	1	136750	1	1		127178	Integrin alpha-M OS=Homo sapiens GN=ITGAM PE=1 SV=2
J3KSP2	89.48	62	549140	1	1		2559	60S ribosomal protein L38 (Fragment) OS=Homo sapiens GN=RPL38 PE=1 SV=1
J3KT73	89.48	20	549140	1	1		7565	60S ribosomal protein L38 OS=Homo sapiens GN=RPL38 PE=1 SV=1
J3QL01	89.48	19	549140	1	1		7977	60S ribosomal protein L38 OS=Homo sapiens GN=RPL38 PE=1 SV=1
P63173	89.48	19	549140	1	1		8218	60S ribosomal protein L38 OS=Homo sapiens GN=RPL38 PE=1 SV=2
P84095	89.09	10	318830	1	1		21308	Rho-related GTP-binding protein RhoG OS=Homo sapiens GN=RHOG PE=1 SV=1
P40926	88.92	7	443820	1	1		35503	Malate dehydrogenase mitochondrial OS=Homo sapiens GN=MDH2 PE=1 SV=3
Q16555	88.76	5	0	1	1		62294	Dihydropyrimidinase-related protein 2 OS=Homo sapiens GN=DPYSL2 PE=1 SV=1
A0A1C7CYX9	88.76	4	0	1	1		73503	Dihydropyrimidinase-related protein 2 OS=Homo sapiens GN=DPYSL2 PE=1 SV=1
P05386	87.79	14	168610	1	1		11514	60S acidic ribosomal protein P1 OS=Homo sapiens GN=RPLP1 PE=1 SV=1
P04839	86.33	3	89475	1	1	Carbamidomethylation	65336	Cytochrome b-245 heavy chain OS=Homo sapiens GN=CYBB PE=1 SV=2
Q15233	86.17	4	175820	2	1		54232	Non-POU domain-containing octamer-binding protein OS=Homo sapiens GN=NONO PE=1 SV=4
P30044	84.55	14	0	1	1		22086	Peroxiredoxin-5 mitochondrial OS=Homo sapiens GN=PRDX5 PE=1 SV=4
Q9UBR2	84	4	387670	1	1		33868	Cathepsin Z OS=Homo sapiens GN=CTSZ PE=1 SV=1
P05204	83.29	17	826690	1	1		9393	Non-histone chromosomal protein HMG-17 OS=Homo sapiens GN=HMGN2 PE=1 SV=3
A0A087WUM5	81.84	31	441640	1	1		7848	Golgi-associated plant pathogenesis-related protein 1 OS=Homo sapiens GN=GLIPR2 PE=1 SV=1
Q5VZR0	81.84	17	441640	1	1		14213	Golgi-associated plant pathogenesis-related protein 1 OS=Homo sapiens GN=GLIPR2 PE=1 SV=1
Q9H4G4	81.84	14	441640	1	1		17218	Golgi-associated plant pathogenesis-related protein 1 OS=Homo sapiens GN=GLIPR2 PE=1 SV=3
P61956	80.79	13	339790	1	1		10871	Small ubiquitin-related modifier 2 OS=Homo sapiens GN=SUMO2 PE=1 SV=3
Q6EEV6	80.79	13	339790	1	1		10685	Small ubiquitin-related modifier 4 OS=Homo sapiens GN=SUMO4 PE=1 SV=2
P55854	80.79	12	339790	1	1		11637	Small ubiquitin-related modifier 3 OS=Homo sapiens GN=SUMO3 PE=1 SV=2
A8MUA9	80.79	9	339790	1	1		15318	SMT3 suppressor of mif two 3 homolog 3 (Yeast) isoform CRA_d OS=Homo sapiens GN=SUMO3 PE=1 SV=1
A8MU27	80.79	8	339790	1	1		16956	Small ubiquitin-related modifier 3 OS=Homo sapiens GN=SUMO3 PE=1 SV=1
H0YLA2	79.05	12	394620	1	1		13058	Signal recognition particle 14 kDa protein OS=Homo sapiens GN=SRP14 PE=1 SV=1
P37108	79.05	10	394620	1	1		14570	Signal recognition particle 14 kDa protein OS=Homo sapiens GN=SRP14 PE=1 SV=2
Q5JRR6	77.82	3	71239	1	1		56852	Ubiquitin-like modifier-activating enzyme 1 OS=Homo sapiens GN=UBA1 PE=1 SV=1
P22314	77.82	1	71239	1	1		117849	Ubiquitin-like modifier-activating enzyme 1 OS=Homo sapiens GN=UBA1 PE=1 SV=3
H0Y5J4	76.97	3	205610	1	1		40279	Drebrin-like protein (Fragment) OS=Homo sapiens GN=DBNL PE=1 SV=1
B4DDD6	76.97	3	205610	1	1		45746	Drebrin-like protein OS=Homo sapiens GN=DBNL PE=1 SV=1
Q9UJU6	76.97	3	205610	1	1		48207	Drebrin-like protein OS=Homo sapiens GN=DBNL PE=1 SV=1
P07900	74.41	2	153650	1	1		84660	Heat shock protein HSP 90-alpha OS=Homo sapiens GN=HSP90AA1 PE=1 SV=5
F8WCR1	74.07	5	536010	1	1		19768	60S ribosomal protein L3 OS=Homo sapiens GN=RPL3 PE=1 SV=1
H7C3M2	74.07	3	536010	1	1		29647	60S ribosomal protein L3 (Fragment) OS=Homo sapiens GN=RPL3 PE=1 SV=1
H7C422	74.07	3	536010	1	1		34968	60S ribosomal protein L3 (Fragment) OS=Homo sapiens GN=RPL3 PE=1 SV=1
P39023	74.07	2	536010	1	1		46109	60S ribosomal protein L3 OS=Homo sapiens GN=RPL3 PE=1 SV=2
K7EJT5	73.99	28	520650	1	1		5083	60S ribosomal protein L22 (Fragment) OS=Homo sapiens GN=RPL22 PE=1 SV=1
K7EP65	73.99	27	520650	1	1		5239	60S ribosomal protein L22 (Fragment) OS=Homo sapiens GN=RPL22 PE=1 SV=1
K7EKS7	73.99	25	520650	1	1		5734	60S ribosomal protein L22 OS=Homo sapiens GN=RPL22 PE=1 SV=1
K7ELC4	73.99	16	520650	1	1		9099	60S ribosomal protein L22 (Fragment) OS=Homo sapiens GN=RPL22 PE=1 SV=1
K7EMH1	73.99	15	520650	1	1		10422	60S ribosomal protein L22 (Fragment) OS=Homo sapiens GN=RPL22 PE=1 SV=1
K7ERI7	73.99	14	520650	1	1		11169	60S ribosomal protein L22 OS=Homo sapiens GN=RPL22 PE=1 SV=1
P35268	73.99	10	520650	1	1		14787	60S ribosomal protein L22 OS=Homo sapiens GN=RPL22 PE=1 SV=2
P60953	73.02	5	295620	1	1	Carbamidomethylation	21259	Cell division control protein 42 homolog OS=Homo sapiens GN=CDC42 PE=1 SV=2
A0A087WVE2	72.13	4	644300	1	1		39182	Ficolin-1 OS=Homo sapiens GN=FCN1 PE=1 SV=1
O00602	72.13	4	644300	1	1		35078	Ficolin-1 OS=Homo sapiens GN=FCN1 PE=1 SV=2
O14773	70.38	2	51294	1	1		61248	Tripeptidyl-peptidase 1 OS=Homo sapiens GN=TPP1 PE=1 SV=2
E9PMA9	68.81	13	258130	1	1	Carbamidomethylation	8428	Ribonuclease inhibitor OS=Homo sapiens GN=RNH1 PE=1 SV=1
E9PMN0	68.81	6	258130	1	1	Carbamidomethylation	18106	Ribonuclease inhibitor OS=Homo sapiens GN=RNH1 PE=1 SV=1
E9PIK5	68.81	6	258130	1	1	Carbamidomethylation	19228	Ribonuclease inhibitor (Fragment) OS=Homo sapiens GN=RNH1 PE=1 SV=1
E9PMJ3	68.81	5	258130	1	1	Carbamidomethylation	20476	Ribonuclease inhibitor (Fragment) OS=Homo sapiens GN=RNH1 PE=1 SV=1
E9PLZ3	68.81	5	258130	1	1	Carbamidomethylation	20990	Ribonuclease inhibitor (Fragment) OS=Homo sapiens GN=RNH1 PE=1 SV=1
E9PIM9	68.81	5	258130	1	1	Carbamidomethylation	21521	Ribonuclease inhibitor (Fragment) OS=Homo sapiens GN=RNH1 PE=1 SV=1
P13489	68.81	2	258130	1	1	Carbamidomethylation	49974	Ribonuclease inhibitor OS=Homo sapiens GN=RNH1 PE=1 SV=2
X6R433	68.76	1	209200	1	1		131130	Receptor-type tyrosine-protein phosphatase C OS=Homo sapiens GN=PTPRC PE=1 SV=1
P08575	68.76	1	209200	1	1		147254	Receptor-type tyrosine-protein phosphatase C OS=Homo sapiens GN=PTPRC PE=1 SV=2
A0A0A0MT22	68.76	1	209200	1	1		147486	Protein tyrosine phosphatase receptor type C isoform CRA_d OS=Homo sapiens GN=PTPRC PE=1 SV=1
E9PKH0	68.76	2	209200	1	1		67888	Receptor-type tyrosine-protein phosphatase C (Fragment) OS=Homo sapiens GN=PTPRC PE=1 SV=2
M3ZCP1	68.76	1	209200	1	1		82982	Receptor-type tyrosine-protein phosphatase C (Fragment) OS=Homo sapiens GN=PTPRC PE=1 SV=1
A0A075B788	68.76	1	209200	1	1		85023	Receptor-type tyrosine-protein phosphatase C OS=Homo sapiens GN=PTPRC PE=1 SV=1
C9K028	68.43	20	341390	1	1		6527	Nucleoside diphosphate kinase A (Fragment) OS=Homo sapiens GN=NME1 PE=1 SV=1
F6XY72	68.43	15	341390	1	1		9583	HCG2001850 isoform CRA_c OS=Homo sapiens GN=NME2 PE=1 SV=2
E5RHP0	68.43	15	341390	1	1		9371	Nucleoside diphosphate kinase A OS=Homo sapiens GN=NME1 PE=3 SV=1
E7ERL0	68.43	9	341390	1	1		15261	Nucleoside diphosphate kinase A OS=Homo sapiens GN=NME1 PE=1 SV=1
P15531	68.43	8	341390	1	1		17149	Nucleoside diphosphate kinase A OS=Homo sapiens GN=NME1 PE=1 SV=1
P22392	68.43	8	341390	1	1		17298	Nucleoside diphosphate kinase B OS=Homo sapiens GN=NME2 PE=1 SV=1
J3KPD9	68.43	6	341390	1	1		22422	NME1-NME2 readthrough OS=Homo sapiens GN=NME1-NME2 PE=1 SV=1
Q32Q12	68.43	4	341390	1	1		32642	Nucleoside diphosphate kinase OS=Homo sapiens GN=NME1-NME2 PE=1 SV=1
Q13011	68.03	5	94931	1	1		35816	Delta(3 5)-Delta(2 4)-dienoyl-CoA isomerase mitochondrial OS=Homo sapiens GN=ECH1 PE=1 SV=2
J3KMX5	66.86	10	0	1	1		16733	40S ribosomal protein S13 OS=Homo sapiens GN=RPS13 PE=1 SV=1
P62277	66.86	10	0	1	1		17222	40S ribosomal protein S13 OS=Homo sapiens GN=RPS13 PE=1 SV=2
O00479	66.28	17	82837	1	1		9539	High mobility group nucleosome-binding domain-containing protein 4 OS=Homo sapiens GN=HMGN4 PE=1 SV=3
E9PFT6	66.16	7	552780	1	1		15420	Hemoglobin subunit delta OS=Homo sapiens GN=HBD PE=1 SV=1
A8MUF7	66.16	11	552780	1	1		9470	Hemoglobin subunit epsilon (Fragment) OS=Homo sapiens GN=HBE1 PE=1 SV=1
F8W6P5	66.16	11	552780	1	1		9670	Hemoglobin subunit beta (Fragment) OS=Homo sapiens GN=HBB PE=1 SV=1
E9PEW8	66.16	10	552780	1	1		11346	Hemoglobin subunit delta (Fragment) OS=Homo sapiens GN=HBD PE=1 SV=1
E9PBW4	66.16	7	552780	1	1		15319	Hemoglobin subunit gamma-2 OS=Homo sapiens GN=HBG2 PE=1 SV=1
P68871	66.16	7	552780	1	1		15998	Hemoglobin subunit beta OS=Homo sapiens GN=HBB PE=1 SV=2
P02100	66.16	7	552780	1	1		16203	Hemoglobin subunit epsilon OS=Homo sapiens GN=HBE1 PE=1 SV=2
P69892	66.16	7	552780	1	1		16126	Hemoglobin subunit gamma-2 OS=Homo sapiens GN=HBG2 PE=1 SV=2
P02042	66.16	7	552780	1	1		16055	Hemoglobin subunit delta OS=Homo sapiens GN=HBD PE=1 SV=2
P69891	66.16	7	552780	1	1		16140	Hemoglobin subunit gamma-1 OS=Homo sapiens GN=HBG1 PE=1 SV=2
Q15717	65.75	3	424650	1	1		36092	ELAV-like protein 1 OS=Homo sapiens GN=ELAVL1 PE=1 SV=2
C9J9W2	64.02	7	192180	1	1		18980	LIM and SH3 domain protein 1 (Fragment) OS=Homo sapiens GN=LASP1 PE=1 SV=1
Q14847	64.02	5	192180	1	1		29717	LIM and SH3 domain protein 1 OS=Homo sapiens GN=LASP1 PE=1 SV=2
A2A3R5	62.99	5	108930	1	1	Carbamidomethylation (DHKE X@N-term)	24968	40S ribosomal protein S6 OS=Homo sapiens GN=RPS6 PE=1 SV=1
P62753	62.99	4	108930	1	1	Carbamidomethylation (DHKE X@N-term)	28681	40S ribosomal protein S6 OS=Homo sapiens GN=RPS6 PE=1 SV=1
Q86V81	62	4	306970	1	1		26888	THO complex subunit 4 OS=Homo sapiens GN=ALYREF PE=1 SV=3
E9PB61	62	4	306970	1	1		27558	THO complex subunit 4 OS=Homo sapiens GN=ALYREF PE=1 SV=1
P10644	61.07	5	60368	1	1		42982	cAMP-dependent protein kinase type I-alpha regulatory subunit OS=Homo sapiens GN=PRKAR1A PE=1 SV=1
P62942	57.9	12	1866500	1	1		11951	Peptidyl-prolyl cis-trans isomerase FKBP1A OS=Homo sapiens GN=FKBP1A PE=1 SV=2
K7EQI0	57.16	8	146640	1	1	Carbamidomethylation	11841	Granulins (Fragment) OS=Homo sapiens GN=GRN PE=1 SV=1
K7EKL3	57.16	2	146640	1	1	Carbamidomethylation	41358	Granulins (Fragment) OS=Homo sapiens GN=GRN PE=1 SV=1
K7EQ05	57.16	2	146640	1	1	Carbamidomethylation	46757	Granulins OS=Homo sapiens GN=GRN PE=1 SV=1
P28799	57.16	2	146640	1	1	Carbamidomethylation	63545	Granulins OS=Homo sapiens GN=GRN PE=1 SV=2
F8VR69	56.08	14	809080	1	1		7191	60S ribosomal protein L6 (Fragment) OS=Homo sapiens GN=RPL6 PE=1 SV=8
F8VZ45	56.08	6	809080	1	1		17800	60S ribosomal protein L6 (Fragment) OS=Homo sapiens GN=RPL6 PE=1 SV=1
U3KQR5	56.08	6	809080	1	1		17928	60S ribosomal protein L6 (Fragment) OS=Homo sapiens GN=RPL6 PE=1 SV=1
Q02878	56.08	3	809080	1	1		32728	60S ribosomal protein L6 OS=Homo sapiens GN=RPL6 PE=1 SV=3
P56385	55.37	14	555160	1	1		7933	ATP synthase subunit e mitochondrial OS=Homo sapiens GN=ATP5I PE=1 SV=2
D6RE99	54.47	18	0	1	1		8634	Histidine triad nucleotide-binding protein 1 OS=Homo sapiens GN=HINT1 PE=1 SV=1
E7EQG2	52.96	3	413360	1	1		41290	Eukaryotic initiation factor 4A-II OS=Homo sapiens GN=EIF4A2 PE=1 SV=1
P60842	52.96	2	413360	1	1		46154	Eukaryotic initiation factor 4A-I OS=Homo sapiens GN=EIF4A1 PE=1 SV=1
Q14240	52.96	2	413360	1	1		46402	Eukaryotic initiation factor 4A-II OS=Homo sapiens GN=EIF4A2 PE=1 SV=2
P62081	50.83	8	57211	1	1		22127	40S ribosomal protein S7 OS=Homo sapiens GN=RPS7 PE=1 SV=1
M0QYG8	49.92	10	429960	1	1		10990	Glia maturation factor gamma OS=Homo sapiens GN=GMFG PE=1 SV=1
M0R1D2	49.92	9	429960	1	1		11964	Glia maturation factor gamma OS=Homo sapiens GN=GMFG PE=1 SV=1
M0R0C1	49.92	8	429960	1	1		12965	Glia maturation factor gamma OS=Homo sapiens GN=GMFG PE=1 SV=1
M0QYJ8	49.92	7	429960	1	1		16136	Glia maturation factor gamma OS=Homo sapiens GN=GMFG PE=1 SV=1
O60234	49.92	6	429960	1	1		16801	Glia maturation factor gamma OS=Homo sapiens GN=GMFG PE=1 SV=1
P60983	49.92	6	429960	1	1		16713	Glia maturation factor beta OS=Homo sapiens GN=GMFB PE=1 SV=2
G3V4P8	49.92	6	429960	1	1		17512	Glia maturation factor beta (Fragment) OS=Homo sapiens GN=GMFB PE=1 SV=1
O14556	49.69	3	629700	1	1		44501	Glyceraldehyde-3-phosphate dehydrogenase testis-specific OS=Homo sapiens GN=GAPDHS PE=1 SV=2
Q00610	49	1	257770	1	1		191613	Clathrin heavy chain 1 OS=Homo sapiens GN=CLTC PE=1 SV=5
A0A087WVQ6	49	1	257770	1	1		192057	Clathrin heavy chain OS=Homo sapiens GN=CLTC PE=1 SV=1
H3BM89	46.5	3	685050	1	1		37657	60S ribosomal protein L4 OS=Homo sapiens GN=RPL4 PE=1 SV=1
P36578	46.5	2	685050	1	1		47697	60S ribosomal protein L4 OS=Homo sapiens GN=RPL4 PE=1 SV=5
Q08211	46.07	1	116100	1	1		140958	ATP-dependent RNA helicase A OS=Homo sapiens GN=DHX9 PE=1 SV=4
O75563	46.01	6	0	1	1		41217	Src kinase-associated phosphoprotein 2 OS=Homo sapiens GN=SKAP2 PE=1 SV=1
S4R418	45.96	2	207570	1	1		59033	Bridging integrator 2 (Fragment) OS=Homo sapiens GN=BIN2 PE=1 SV=2
F5H0W4	45.96	2	207570	1	1		59186	Bridging integrator 2 OS=Homo sapiens GN=BIN2 PE=1 SV=1
A0A0A0MT10	45.96	2	207570	1	1		59864	Bridging integrator 2 (Fragment) OS=Homo sapiens GN=BIN2 PE=1 SV=1
Q9UBW5	45.96	2	207570	1	1		61875	Bridging integrator 2 OS=Homo sapiens GN=BIN2 PE=1 SV=3
A0A087X188	45.96	2	207570	1	1		65024	Bridging integrator 2 OS=Homo sapiens GN=BIN2 PE=1 SV=1
Q9NZT1	45.3	5	2522800	1	1		15893	Calmodulin-like protein 5 OS=Homo sapiens GN=CALML5 PE=1 SV=2
P08571	44.69	2	307970	1	1	Carbamidomethylation	40076	Monocyte differentiation antigen CD14 OS=Homo sapiens GN=CD14 PE=1 SV=2
Q9BXP2	44.46	1	0	1	1		96110	Solute carrier family 12 member 9 OS=Homo sapiens GN=SLC12A9 PE=1 SV=1
B4DXW1	44.25	3	284570	1	1		42004	Actin-related protein 3 OS=Homo sapiens GN=ACTR3 PE=1 SV=1
P61158	44.25	3	284570	1	1		47371	Actin-related protein 3 OS=Homo sapiens GN=ACTR3 PE=1 SV=3
P42766	43.61	7	190470	1	1		14551	60S ribosomal protein L35 OS=Homo sapiens GN=RPL35 PE=1 SV=2
P23284	42.92	4	207270	1	1		23743	Peptidyl-prolyl cis-trans isomerase B OS=Homo sapiens GN=PPIB PE=1 SV=2
H7C2Z6	41.75	5	265920	1	1		16831	Grancalcin (Fragment) OS=Homo sapiens GN=GCA PE=1 SV=1
H7BXD5	41.75	4	265920	1	1		22109	Grancalcin OS=Homo sapiens GN=GCA PE=1 SV=1
P28676	41.75	3	265920	1	1		24010	Grancalcin OS=Homo sapiens GN=GCA PE=1 SV=2
P32320	40.62	7	446750	1	1		16185	Cytidine deaminase OS=Homo sapiens GN=CDA PE=1 SV=2
P20160	40.09	3	1299400	1	1		26886	Azurocidin OS=Homo sapiens GN=AZU1 PE=1 SV=3
Q9UKY7	38.72	3	348670	1	1		27335	Protein CDV3 homolog OS=Homo sapiens GN=CDV3 PE=1 SV=1
P49643	38.27	2	517200	1	1		58806	DNA primase large subunit OS=Homo sapiens GN=PRIM2 PE=1 SV=2
P22061	37.74	4	542770	1	1		24636	Protein-L-isoaspartate(D-aspartate) O-methyltransferase OS=Homo sapiens GN=PCMT1 PE=1 SV=4
F6S8N6	37.74	4	542770	1	1		26627	Protein-L-isoaspartate(D-aspartate) O-methyltransferase OS=Homo sapiens GN=PCMT1 PE=1 SV=1
A0A0A0MRJ6	37.74	3	542770	1	1		30315	Protein-L-isoaspartate O-methyltransferase OS=Homo sapiens GN=PCMT1 PE=1 SV=1
H7BY58	37.74	3	542770	1	1		30358	Protein-L-isoaspartate O-methyltransferase OS=Homo sapiens GN=PCMT1 PE=1 SV=1
Q6VVX0	37.53	1	0	1	1		57359	Vitamin D 25-hydroxylase OS=Homo sapiens GN=CYP2R1 PE=1 SV=1
B8ZZL8	37.1	7	498610	1	1		10690	10 kDa heat shock protein mitochondrial OS=Homo sapiens GN=HSPE1 PE=1 SV=1
P61604	37.1	7	498610	1	1		10932	10 kDa heat shock protein mitochondrial OS=Homo sapiens GN=HSPE1 PE=1 SV=2
S4R3N1	37.1	3	498610	1	1		29737	HSPE1-MOB4 readthrough OS=Homo sapiens GN=HSPE1-MOB4 PE=3 SV=1
D6RAQ8	36.65	9	210500	1	1		11859	Calnexin (Fragment) OS=Homo sapiens GN=CANX PE=1 SV=1
D6RAU8	36.65	7	210500	1	1		14804	Calnexin (Fragment) OS=Homo sapiens GN=CANX PE=1 SV=1
D6RB85	36.65	7	210500	1	1		16008	Calnexin (Fragment) OS=Homo sapiens GN=CANX PE=1 SV=1
D6RDP7	36.65	6	210500	1	1		18658	Calnexin (Fragment) OS=Homo sapiens GN=CANX PE=1 SV=1
H0Y9Q7	36.65	6	210500	1	1		18838	Calnexin (Fragment) OS=Homo sapiens GN=CANX PE=1 SV=1
P27824	36.65	2	210500	1	1		67568	Calnexin OS=Homo sapiens GN=CANX PE=1 SV=2
Q15149	35.7	0	291160	1	1		531796	Plectin OS=Homo sapiens GN=PLEC PE=1 SV=3
E9PM36	35.24	5	151530	1	1		21613	40S ribosomal protein S2 OS=Homo sapiens GN=RPS2 PE=1 SV=1
E9PMM9	35.24	5	151530	1	1		22975	40S ribosomal protein S2 (Fragment) OS=Homo sapiens GN=RPS2 PE=1 SV=1
P15880	35.24	4	151530	1	1		31324	40S ribosomal protein S2 OS=Homo sapiens GN=RPS2 PE=1 SV=2
I3L398	33.89	4	52263	1	1	Carbamidomethylation	23005	Protein disulfide-isomerase (Fragment) OS=Homo sapiens GN=P4HB PE=1 SV=1
H0Y3Z3	33.89	3	52263	1	1	Carbamidomethylation	31552	Protein disulfide-isomerase (Fragment) OS=Homo sapiens GN=P4HB PE=1 SV=1
H7BZ94	33.89	2	52263	1	1	Carbamidomethylation	52502	Protein disulfide-isomerase OS=Homo sapiens GN=P4HB PE=1 SV=2
P07237	33.89	1	52263	1	1	Carbamidomethylation	57116	Protein disulfide-isomerase OS=Homo sapiens GN=P4HB PE=1 SV=3
Q09666	33.08	0	390360	1	1		629114	Neuroblast differentiation-associated protein AHNAK OS=Homo sapiens GN=AHNAK PE=1 SV=2
P12273	32.98	7	85967	1	1		16572	Prolactin-inducible protein OS=Homo sapiens GN=PIP PE=1 SV=1
Q9HC35	32.84	1	386950	1	1		108916	Echinoderm microtubule-associated protein-like 4 OS=Homo sapiens GN=EML4 PE=1 SV=3

## Sheet: 50000 cells
Accession	-10lgP	Coverage (%)	Area	#Peptides	#Unique	PTM	Avg. Mass	Description
P08670	406.18	55	94619000	32	26	Carbamidomethylation; Phosphorylation (STY); Oxidation (M); Acetylation (Protein N-term); Deamidation (NQ); 5 more	53652	Vimentin OS=Homo sapiens GN=VIM PE=1 SV=4
P35579	422.3	13	55311000	22	22	Deamidation (NQ); Pyro-glu from Q; Sodium adduct; Carbamidomethylation (DHKE X@N-term)	226530	Myosin-9 OS=Homo sapiens GN=MYH9 PE=1 SV=4
Q5HY54	285.82	7	10746000	13	13	Carbamidomethylation; Carbamidomethylation (DHKE X@N-term)	276548	Filamin-A OS=Homo sapiens GN=FLNA PE=1 SV=1
P21333	285.82	7	10746000	13	13	Carbamidomethylation; Carbamidomethylation (DHKE X@N-term)	280737	Filamin-A OS=Homo sapiens GN=FLNA PE=1 SV=4
P62328	323.75	100	148640000	12	12	Oxidation (M); Acetylation (Protein N-term); Carbamylation; Carbamidomethylation (DHKE X@N-term); Formation of five membered aromatic heterocycle	5053	Thymosin beta-4 OS=Homo sapiens GN=TMSB4X PE=1 SV=2
P26038	252.5	16	33954000	13	12	Oxidation (M); Deamidation (NQ); Carbamidomethylation (DHKE X@N-term)	67820	Moesin OS=Homo sapiens GN=MSN PE=1 SV=3
P06733	265.18	24	40379000	9	9	Carbamidomethylation; Deamidation (NQ); Carbamidomethylation (DHKE X@N-term); Iodination; Glycidamide adduct	47169	Alpha-enolase OS=Homo sapiens GN=ENO1 PE=1 SV=2
P57053	249.67	56	91987000	9	9	Pyro-glu from Q; Carbamidomethylation (DHKE X@N-term); Glycidamide adduct	13944	Histone H2B type F-S OS=Homo sapiens GN=H2BFS PE=1 SV=2
O60814	249.67	56	91987000	9	9	Pyro-glu from Q; Carbamidomethylation (DHKE X@N-term); Glycidamide adduct	13890	Histone H2B type 1-K OS=Homo sapiens GN=HIST1H2BK PE=1 SV=3
P62807	249.67	56	91987000	9	9	Pyro-glu from Q; Carbamidomethylation (DHKE X@N-term); Glycidamide adduct	13906	Histone H2B type 1-C/E/F/G/I OS=Homo sapiens GN=HIST1H2BC PE=1 SV=4
P60709	322.01	29	349760000	16	8	Carbamidomethylation; Oxidation (M); Acetylation (K); Acetylation (Protein N-term); Deamidation (NQ); 5 more	41737	Actin cytoplasmic 1 OS=Homo sapiens GN=ACTB PE=1 SV=1
P06702	276.59	43	103530000	8	8	Carbamidomethylation; Oxidation (M); Acetylation (Protein N-term); Deamidation (NQ); Carbamidomethylation (DHKE X@N-term); 3 more	13242	Protein S100-A9 OS=Homo sapiens GN=S100A9 PE=1 SV=1
P04075	248.62	22	9895100	8	8	Carbamidomethylation; Deamidation (NQ); Pyro-glu from Q; Carbamidomethylation (DHKE X@N-term)	39420	Fructose-bisphosphate aldolase A OS=Homo sapiens GN=ALDOA PE=1 SV=2
J3KPS3	248.62	22	9895100	8	8	Carbamidomethylation; Deamidation (NQ); Pyro-glu from Q; Carbamidomethylation (DHKE X@N-term)	39818	Fructose-bisphosphate aldolase OS=Homo sapiens GN=ALDOA PE=1 SV=1
H3BTN5	213.55	16	9864300	8	8	Carbamidomethylation; Deamidation (NQ); Carbamidomethylation (DHKE X@N-term)	53045	Pyruvate kinase (Fragment) OS=Homo sapiens GN=PKM PE=1 SV=1
P14618	213.55	15	9864300	8	8	Carbamidomethylation; Deamidation (NQ); Carbamidomethylation (DHKE X@N-term)	57937	Pyruvate kinase PKM OS=Homo sapiens GN=PKM PE=1 SV=4
P29401	179.58	11	10896000	8	8	Carbamidomethylation (DHKE X@N-term)	67878	Transketolase OS=Homo sapiens GN=TKT PE=1 SV=3
H0YMD0	260.61	35	5472500	7	7	Carbamidomethylation; Acetylation (Protein N-term); Amidation	25342	Annexin (Fragment) OS=Homo sapiens GN=ANXA2 PE=1 SV=1
H0YMU9	260.61	35	5472500	7	7	Carbamidomethylation; Acetylation (Protein N-term); Amidation	25569	Annexin OS=Homo sapiens GN=ANXA2 PE=1 SV=1
H0YN42	260.61	31	5472500	7	7	Carbamidomethylation; Acetylation (Protein N-term); Amidation	28825	Annexin (Fragment) OS=Homo sapiens GN=ANXA2 PE=1 SV=1
P07355	260.61	24	5472500	7	7	Carbamidomethylation; Acetylation (Protein N-term); Amidation	38604	Annexin A2 OS=Homo sapiens GN=ANXA2 PE=1 SV=2
P04083	233.06	19	17345000	7	7		38714	Annexin A1 OS=Homo sapiens GN=ANXA1 PE=1 SV=2
P05109	228.4	42	95501000	7	7	Carbamidomethylation; Oxidation (M); Deamidation (NQ); Dehydration; Carbamidomethylation (DHKE X@N-term)	10835	Protein S100-A8 OS=Homo sapiens GN=S100A8 PE=1 SV=1
P61626	210.41	36	130270000	7	7	Carbamidomethylation; Deamidation (NQ); Carbamidomethylation (DHKE X@N-term); Dihydroxy methylglyoxal adduct	16537	Lysozyme C OS=Homo sapiens GN=LYZ PE=1 SV=1
P20700	189.93	12	4136200	7	7	Carbamidomethylation; Deamidation (NQ); Dehydration	66408	Lamin-B1 OS=Homo sapiens GN=LMNB1 PE=1 SV=2
Q86YZ3	315.06	3	12997000	6	6	Deamidation (NQ); Pyro-glu from Q; Carbamidomethylation (DHKE X@N-term)	282389	Hornerin OS=Homo sapiens GN=HRNR PE=1 SV=2
F8W6I7	225.35	25	16030000	6	6	Oxidation (M); Acetylation (Protein N-term); Dimethylation(KR); Carbamidomethylation (DHKE X@N-term)	33155	Heterogeneous nuclear ribonucleoprotein A1 OS=Homo sapiens GN=HNRNPA1 PE=1 SV=2
P09651	225.35	21	16030000	6	6	Oxidation (M); Acetylation (Protein N-term); Dimethylation(KR); Carbamidomethylation (DHKE X@N-term)	38747	Heterogeneous nuclear ribonucleoprotein A1 OS=Homo sapiens GN=HNRNPA1 PE=1 SV=5
P22626	193.73	18	10909000	6	6	Deamidation (NQ)	37430	Heterogeneous nuclear ribonucleoproteins A2/B1 OS=Homo sapiens GN=HNRNPA2B1 PE=1 SV=2
P08311	172.84	20	15203000	6	6		28837	Cathepsin G OS=Homo sapiens GN=CTSG PE=1 SV=2
P16401	290.29	35	13354000	10	5	Acetylation (Protein N-term); Deamidation (NQ); Carbamidomethylation (DHKE X@N-term)	22580	Histone H1.5 OS=Homo sapiens GN=HIST1H1B PE=1 SV=3
Q15149	152.28	1	5284500	5	5	Propionamide (K X@N-term)	531796	Plectin OS=Homo sapiens GN=PLEC PE=1 SV=3
E7EUT5	142.44	16	4719500	5	5	Deamidation (NQ)	27871	Glyceraldehyde-3-phosphate dehydrogenase OS=Homo sapiens GN=GAPDH PE=1 SV=1
P04406	142.44	12	4719500	5	5	Deamidation (NQ)	36053	Glyceraldehyde-3-phosphate dehydrogenase OS=Homo sapiens GN=GAPDH PE=1 SV=3
A0A087WVQ9	135.17	8	1677200	5	5	Carbamidomethylation (DHKE X@N-term)	47883	Elongation factor 1-alpha 1 OS=Homo sapiens GN=EEF1A1 PE=1 SV=1
Q5VTE0	135.17	8	1677200	5	5	Carbamidomethylation (DHKE X@N-term)	50185	Putative elongation factor 1-alpha-like 3 OS=Homo sapiens GN=EEF1A1P5 PE=5 SV=1
P68104	135.17	8	1677200	5	5	Carbamidomethylation (DHKE X@N-term)	50141	Elongation factor 1-alpha 1 OS=Homo sapiens GN=EEF1A1 PE=1 SV=1
F5H3P3	293	32	15425000	4	4	Acetylation (Protein N-term); Carbamidomethylation (DHKE X@N-term)	17837	Rho GDP-dissociation inhibitor 2 (Fragment) OS=Homo sapiens GN=ARHGDIB PE=1 SV=8
P52566	293	25	15425000	4	4	Acetylation (Protein N-term); Carbamidomethylation (DHKE X@N-term)	22988	Rho GDP-dissociation inhibitor 2 OS=Homo sapiens GN=ARHGDIB PE=1 SV=3
F5H2R5	293	57	15425000	4	4	Acetylation (Protein N-term); Carbamidomethylation (DHKE X@N-term)	9792	Rho GDP-dissociation inhibitor 2 (Fragment) OS=Homo sapiens GN=ARHGDIB PE=1 SV=1
F5H6Q0	293	45	15425000	4	4	Acetylation (Protein N-term); Carbamidomethylation (DHKE X@N-term)	12530	Rho GDP-dissociation inhibitor 2 (Fragment) OS=Homo sapiens GN=ARHGDIB PE=1 SV=1
P30101	181.49	11	5069500	4	4	Pyro-glu from Q	56782	Protein disulfide-isomerase A3 OS=Homo sapiens GN=PDIA3 PE=1 SV=4
P25705	163.17	10	5617400	4	4		59751	ATP synthase subunit alpha mitochondrial OS=Homo sapiens GN=ATP5A1 PE=1 SV=1
P05164	159.93	6	3183400	4	4	Carbamidomethylation; Oxidation (M); Deamidation (NQ); Ammonia-loss (N)	83869	Myeloperoxidase OS=Homo sapiens GN=MPO PE=1 SV=1
P16949	152.83	28	1169500	4	4	Deamidation (NQ)	17302	Stathmin OS=Homo sapiens GN=STMN1 PE=1 SV=3
E9PP50	148.05	21	15300000	4	4	Acetylation (Protein N-term); Carbamidomethylation (DHKE X@N-term)	17778	Cofilin-1 (Fragment) OS=Homo sapiens GN=CFL1 PE=1 SV=8
P23528	148.05	20	15300000	4	4	Acetylation (Protein N-term); Carbamidomethylation (DHKE X@N-term)	18502	Cofilin-1 OS=Homo sapiens GN=CFL1 PE=1 SV=3
E9PKE3	138.75	5	4336300	4	4		68806	Heat shock cognate 71 kDa protein OS=Homo sapiens GN=HSPA8 PE=1 SV=1
P11142	138.75	5	4336300	4	4		70898	Heat shock cognate 71 kDa protein OS=Homo sapiens GN=HSPA8 PE=1 SV=1
P07237	128.23	7	2528400	4	4	Deamidation (NQ)	57116	Protein disulfide-isomerase OS=Homo sapiens GN=P4HB PE=1 SV=3
P26447	106.3	31	13699000	4	4	Carbamidomethylation (DHKE X@N-term)	11729	Protein S100-A4 OS=Homo sapiens GN=S100A4 PE=1 SV=1
P05204	263.14	51	138730000	3	3	Deamidation (NQ); Carbamidomethylation (DHKE X@N-term)	9393	Non-histone chromosomal protein HMG-17 OS=Homo sapiens GN=HMGN2 PE=1 SV=3
P63313	174.03	68	6148400	3	3	Oxidation (M); Acetylation (K); Acetylation (Protein N-term); Carbamidomethylation (DHKE X@N-term)	5026	Thymosin beta-10 OS=Homo sapiens GN=TMSB10 PE=1 SV=2
P09429	172.94	22	4338100	5	3	Carbamidomethylation (DHKE X@N-term)	24894	High mobility group protein B1 OS=Homo sapiens GN=HMGB1 PE=1 SV=3
P60174	170.42	13	2928400	3	3		30791	Triosephosphate isomerase OS=Homo sapiens GN=TPI1 PE=1 SV=3
P26583	163.45	18	3352100	5	3		24034	High mobility group protein B2 OS=Homo sapiens GN=HMGB2 PE=1 SV=2
F2Z2W6	159.02	68	10192000	3	3	Carbamidomethylation (DHKE X@N-term)	4745	Non-histone chromosomal protein HMG-14 OS=Homo sapiens GN=HMGN1 PE=1 SV=1
F2Z2Y5	159.02	67	10192000	3	3	Carbamidomethylation (DHKE X@N-term)	4813	Non-histone chromosomal protein HMG-14 OS=Homo sapiens GN=HMGN1 PE=1 SV=1
H7BXJ5	159.02	62	10192000	3	3	Carbamidomethylation (DHKE X@N-term)	5166	Non-histone chromosomal protein HMG-14 OS=Homo sapiens GN=HMGN1 PE=1 SV=1
P05114	159.02	30	10192000	3	3	Carbamidomethylation (DHKE X@N-term)	10659	Non-histone chromosomal protein HMG-14 OS=Homo sapiens GN=HMGN1 PE=1 SV=3
H0Y2Y8	150.81	8	3101400	3	3		57643	Zyxin (Fragment) OS=Homo sapiens GN=ZYX PE=1 SV=1
Q15942	150.81	7	3101400	3	3		61277	Zyxin OS=Homo sapiens GN=ZYX PE=1 SV=1
P06748	150.01	15	2955400	3	3	Deamidation (NQ)	32575	Nucleophosmin OS=Homo sapiens GN=NPM1 PE=1 SV=2
P62937	145.42	22	6976100	3	3	Carbamidomethylation; Carbamidomethylation (DHKE X@N-term)	18012	Peptidyl-prolyl cis-trans isomerase A OS=Homo sapiens GN=PPIA PE=1 SV=2
P23246	145.14	5	1018100	3	3		76150	Splicing factor proline- and glutamine-rich OS=Homo sapiens GN=SFPQ PE=1 SV=2
Q15365	141.81	10	2244700	3	3	Carbamidomethylation	37498	Poly(rC)-binding protein 1 OS=Homo sapiens GN=PCBP1 PE=1 SV=2
P07195	138.17	11	1954200	3	3	Carbamidomethylation	36639	L-lactate dehydrogenase B chain OS=Homo sapiens GN=LDHB PE=1 SV=2
Q00839	128.49	8	1440200	3	3	Deamidation (NQ); Carbamidomethylation (DHKE X@N-term)	90585	Heterogeneous nuclear ribonucleoprotein U OS=Homo sapiens GN=HNRNPU PE=1 SV=6
P08246	121.81	7	4150200	3	3	Carbamidomethylation	28518	Neutrophil elastase OS=Homo sapiens GN=ELANE PE=1 SV=1
Q96QH2	113.43	5	1657100	3	3	Propionamide (K X@N-term)	79245	PML-RARA-regulated adapter molecule 1 OS=Homo sapiens GN=PRAM1 PE=1 SV=2
Q92945	113.11	5	749690	3	3		73115	Far upstream element-binding protein 2 OS=Homo sapiens GN=KHSRP PE=1 SV=4
A0A087WTP3	113.11	5	749690	3	3		73028	Far upstream element-binding protein 2 OS=Homo sapiens GN=KHSRP PE=1 SV=1
X6RJP6	112.46	18	2490200	3	3		21086	Transgelin-2 (Fragment) OS=Homo sapiens GN=TAGLN2 PE=1 SV=1
P37802	112.46	17	2490200	3	3		22391	Transgelin-2 OS=Homo sapiens GN=TAGLN2 PE=1 SV=3
P09382	111.99	22	815850	3	3	Carbamidomethylation; Deamidation (NQ)	14716	Galectin-1 OS=Homo sapiens GN=LGALS1 PE=1 SV=2
O43516	108.7	9	2783800	3	3		51259	WAS/WASL-interacting protein family member 1 OS=Homo sapiens GN=WIPF1 PE=1 SV=3
P26373	106.9	14	1039000	3	3		24261	60S ribosomal protein L13 OS=Homo sapiens GN=RPL13 PE=1 SV=4
P14625	106.46	3	3587300	3	3		92469	Endoplasmin OS=Homo sapiens GN=HSP90B1 PE=1 SV=1
A0A087WWU8	276.36	31	5642800	8	2		26421	Tropomyosin alpha-3 chain OS=Homo sapiens GN=TPM3 PE=1 SV=1
P16403	273.57	42	4006400	10	2	Deamidation (NQ); Carbamidomethylation (DHKE X@N-term)	21365	Histone H1.2 OS=Homo sapiens GN=HIST1H1C PE=1 SV=2
P10412	271.39	41	4938700	10	2	Acetylation (Protein N-term); Deamidation (NQ); Sodium adduct; Carbamidomethylation (DHKE X@N-term)	21865	Histone H1.4 OS=Homo sapiens GN=HIST1H1E PE=1 SV=2
K7EK07	238.35	42	1328900	12	2	Acetylation (K); Acetylation (N-term); Deamidation (NQ); Dimethylation(KR); Methylation(KR); 3 more	14914	Histone H3 (Fragment) OS=Homo sapiens GN=H3F3B PE=1 SV=1
P84243	238.35	40	1328900	12	2	Acetylation (K); Acetylation (N-term); Deamidation (NQ); Dimethylation(KR); Methylation(KR); 3 more	15328	Histone H3.3 OS=Homo sapiens GN=H3F3A PE=1 SV=2
K7EMV3	238.35	52	1328900	11	2	Acetylation (K); Acetylation (N-term); Deamidation (NQ); Dimethylation(KR); Methylation(KR); 3 more	10334	Histone H3 OS=Homo sapiens GN=H3F3B PE=1 SV=1
B4DEB1	238.35	39	1328900	11	2	Acetylation (K); Acetylation (N-term); Deamidation (NQ); Dimethylation(KR); Methylation(KR); 3 more	14053	Histone H3 OS=Homo sapiens GN=H3F3A PE=1 SV=1
K7ES00	238.35	32	1328900	11	2	Acetylation (K); Acetylation (N-term); Deamidation (NQ); Dimethylation(KR); Methylation(KR); 3 more	16621	Histone H3.3 (Fragment) OS=Homo sapiens GN=H3F3B PE=1 SV=1
P16104	189.96	43	1269400	4	2	Deamidation (NQ); Carbamidomethylation (DHKE X@N-term); Carboxymethyl (KW X@N-term)	15145	Histone H2AX OS=Homo sapiens GN=H2AFX PE=1 SV=2
F8W1R7	180.09	23	1695300	2	2	Carbamidomethylation; Acetylation (Protein N-term); Carbamidomethylation (DHKE X@N-term)	16290	Myosin light polypeptide 6 OS=Homo sapiens GN=MYL6 PE=1 SV=1
P60660	180.09	22	1695300	2	2	Carbamidomethylation; Acetylation (Protein N-term); Carbamidomethylation (DHKE X@N-term)	16930	Myosin light polypeptide 6 OS=Homo sapiens GN=MYL6 PE=1 SV=2
G3V1V0	180.09	20	1695300	2	2	Carbamidomethylation; Acetylation (Protein N-term); Carbamidomethylation (DHKE X@N-term)	18037	Myosin light polypeptide 6 OS=Homo sapiens GN=MYL6 PE=1 SV=1
P50552	150.38	7	2665400	2	2	Phosphorylation (STY); Pyro-glu from Q; Carbamidomethylation (DHKE X@N-term)	39830	Vasodilator-stimulated phosphoprotein OS=Homo sapiens GN=VASP PE=1 SV=3
F8WE65	134.07	24	6575800	2	2	Carbamidomethylation; Carbamidomethylation (DHKE X@N-term)	13022	Peptidyl-prolyl cis-trans isomerase OS=Homo sapiens GN=PPIA PE=1 SV=1
C9J5S7	134.07	24	6575800	2	2	Carbamidomethylation; Carbamidomethylation (DHKE X@N-term)	13208	Peptidyl-prolyl cis-trans isomerase OS=Homo sapiens GN=PPIA PE=1 SV=1
P17096	142.39	39	2310600	2	2	Carbamidomethylation (DHKE X@N-term)	11676	High mobility group protein HMG-I/HMG-Y OS=Homo sapiens GN=HMGA1 PE=1 SV=3
Q9ULZ3	141.7	16	520680	2	2		21627	Apoptosis-associated speck-like protein containing a CARD OS=Homo sapiens GN=PYCARD PE=1 SV=2
K7EJ44	141.55	24	3712500	2	2	Deamidation (NQ)	11390	Profilin OS=Homo sapiens GN=PFN1 PE=1 SV=1
P07737	141.55	18	3712500	2	2	Deamidation (NQ)	15054	Profilin-1 OS=Homo sapiens GN=PFN1 PE=1 SV=2
P60953	138.09	7	5794000	2	2	Pyro-glu from Q; Carbamidomethylation (DHKE X@N-term)	21259	Cell division control protein 42 homolog OS=Homo sapiens GN=CDC42 PE=1 SV=2
P62805	125.07	21	20264000	2	2		11367	Histone H4 OS=Homo sapiens GN=HIST1H4A PE=1 SV=2
J3KRE2	118.56	25	346840	2	2		14814	Rho GDP-dissociation inhibitor 1 OS=Homo sapiens GN=ARHGDIA PE=1 SV=1
J3KTF8	118.56	17	346840	2	2		21517	Rho GDP-dissociation inhibitor 1 (Fragment) OS=Homo sapiens GN=ARHGDIA PE=1 SV=8
P52565	118.56	16	346840	2	2		23207	Rho GDP-dissociation inhibitor 1 OS=Homo sapiens GN=ARHGDIA PE=1 SV=3
J3QQX2	118.56	14	346840	2	2		25831	Rho GDP-dissociation inhibitor 1 OS=Homo sapiens GN=ARHGDIA PE=1 SV=1
P13498	114.59	13	3289700	2	2		21013	Cytochrome b-245 light chain OS=Homo sapiens GN=CYBA PE=1 SV=3
P13796	111.41	4	2895600	2	2		70289	Plastin-2 OS=Homo sapiens GN=LCP1 PE=1 SV=6
B7Z645	110.45	5	457010	2	2		52046	Heterogeneous nuclear ribonucleoprotein Q OS=Homo sapiens GN=SYNCRIP PE=1 SV=1
O60506	110.45	3	457010	2	2		69603	Heterogeneous nuclear ribonucleoprotein Q OS=Homo sapiens GN=SYNCRIP PE=1 SV=2
Q8N0Y7	108.79	7	2561400	2	2	Deamidation (NQ)	28777	Probable phosphoglycerate mutase 4 OS=Homo sapiens GN=PGAM4 PE=3 SV=1
P18669	108.79	7	2561400	2	2	Deamidation (NQ)	28804	Phosphoglycerate mutase 1 OS=Homo sapiens GN=PGAM1 PE=1 SV=2
H0YB22	106.49	11	625210	2	2		12951	40S ribosomal protein S14 (Fragment) OS=Homo sapiens GN=RPS14 PE=1 SV=1
E5RH77	106.49	10	625210	2	2		14295	40S ribosomal protein S14 OS=Homo sapiens GN=RPS14 PE=1 SV=1
P62263	106.49	9	625210	2	2		16273	40S ribosomal protein S14 OS=Homo sapiens GN=RPS14 PE=1 SV=3
Q5T123	105.56	20	3107700	2	2		9381	SH3 domain-binding glutamic acid-rich-like protein 3 OS=Homo sapiens GN=SH3BGRL3 PE=1 SV=1
Q9H299	105.56	19	3107700	2	2		10438	SH3 domain-binding glutamic acid-rich-like protein 3 OS=Homo sapiens GN=SH3BGRL3 PE=1 SV=1
Q96C19	103.88	10	2532100	2	2		26697	EF-hand domain-containing protein D2 OS=Homo sapiens GN=EFHD2 PE=1 SV=1
Q9UBR2	93.59	4	1299300	2	2		33868	Cathepsin Z OS=Homo sapiens GN=CTSZ PE=1 SV=1
Q8NC51	92.01	5	4771600	2	2		44965	Plasminogen activator inhibitor 1 RNA-binding protein OS=Homo sapiens GN=SERBP1 PE=1 SV=2
K7EQ05	85.66	4	688950	2	2	Carbamidomethylation	46757	Granulins OS=Homo sapiens GN=GRN PE=1 SV=1
P28799	85.66	3	688950	2	2	Carbamidomethylation	63545	Granulins OS=Homo sapiens GN=GRN PE=1 SV=2
Q96AE4	82.91	4	659090	2	2		67560	Far upstream element-binding protein 1 OS=Homo sapiens GN=FUBP1 PE=1 SV=3
E9PEB5	82.91	4	659090	2	2		68904	Far upstream element-binding protein 1 OS=Homo sapiens GN=FUBP1 PE=1 SV=1
G3V555	76.94	10	3028500	2	2		19178	Heterogeneous nuclear ribonucleoproteins C1/C2 (Fragment) OS=Homo sapiens GN=HNRNPC PE=1 SV=1
G3V575	76.94	10	3028500	2	2		20366	Heterogeneous nuclear ribonucleoproteins C1/C2 (Fragment) OS=Homo sapiens GN=HNRNPC PE=1 SV=1
G3V576	76.94	8	3028500	2	2		25257	Heterogeneous nuclear ribonucleoproteins C1/C2 OS=Homo sapiens GN=HNRNPC PE=1 SV=1
G3V4W0	76.94	7	3028500	2	2		28916	Heterogeneous nuclear ribonucleoproteins C1/C2 (Fragment) OS=Homo sapiens GN=HNRNPC PE=1 SV=1
B4DY08	76.94	6	3028500	2	2		31972	Heterogeneous nuclear ribonucleoproteins C1/C2 OS=Homo sapiens GN=HNRNPC PE=1 SV=1
B2R5W2	76.94	6	3028500	2	2		31948	Heterogeneous nuclear ribonucleoproteins C1/C2 OS=Homo sapiens GN=HNRNPC PE=1 SV=1
G3V4C1	76.94	6	3028500	2	2		32238	Heterogeneous nuclear ribonucleoproteins C1/C2 OS=Homo sapiens GN=HNRNPC PE=1 SV=1
G3V2Q1	76.94	6	3028500	2	2		33571	Heterogeneous nuclear ribonucleoproteins C1/C2 OS=Homo sapiens GN=HNRNPC PE=1 SV=1
P07910	76.94	6	3028500	2	2		33670	Heterogeneous nuclear ribonucleoproteins C1/C2 OS=Homo sapiens GN=HNRNPC PE=1 SV=4
P41218	76.15	5	447730	2	2		45836	Myeloid cell nuclear differentiation antigen OS=Homo sapiens GN=MNDA PE=1 SV=1
P30050	70.62	11	812810	2	2		17819	60S ribosomal protein L12 OS=Homo sapiens GN=RPL12 PE=1 SV=1
P61978	69.45	4	7815100	2	2	Carbamidomethylation	50976	Heterogeneous nuclear ribonucleoprotein K OS=Homo sapiens GN=HNRNPK PE=1 SV=1
Q5T6W2	69.45	5	7815100	2	2	Carbamidomethylation	41807	Heterogeneous nuclear ribonucleoprotein K (Fragment) OS=Homo sapiens GN=HNRNPK PE=1 SV=1
H3BUY5	65.26	10	1214500	2	2		28745	RNA-binding motif protein X chromosome OS=Homo sapiens GN=RBMX PE=1 SV=1
P38159	65.26	6	1214500	2	2		42332	RNA-binding motif protein X chromosome OS=Homo sapiens GN=RBMX PE=1 SV=3
Q9Y3Z3	58.8	3	1020500	2	2	Carbamidomethylation	72201	Deoxynucleoside triphosphate triphosphohydrolase SAMHD1 OS=Homo sapiens GN=SAMHD1 PE=1 SV=2
B4E0K5	36.32	6	601250	2	2		32357	Mitogen-activated protein kinase OS=Homo sapiens GN=MAPK14 PE=1 SV=1
Q16539	36.32	4	601250	2	2		41293	Mitogen-activated protein kinase 14 OS=Homo sapiens GN=MAPK14 PE=1 SV=3
P06753	267.33	24	3583800	7	1	Carboxyl modification with ethanolamine	32950	Tropomyosin alpha-3 chain OS=Homo sapiens GN=TPM3 PE=1 SV=2
P16402	257.42	29	0	8	1	Deamidation (NQ); Carbamidomethylation (DHKE X@N-term)	22350	Histone H1.3 OS=Homo sapiens GN=HIST1H1D PE=1 SV=2
Q5TEC6	221.72	38	3335300	10	1	Acetylation (K); Deamidation (NQ); Dimethylation(KR); Methylation(KR); Ubiquitin; Carbamidomethylation (DHKE X@N-term)	15430	Histone H3 OS=Homo sapiens GN=HIST2H3PS2 PE=1 SV=1
P17661	209.41	9	666760	7	1	Deamidation (NQ); Dimethylation(KR); Carbamidomethylation (DHKE X@N-term)	53536	Desmin OS=Homo sapiens GN=DES PE=1 SV=3
Q562R1	198.53	14	1419200	9	1	Carbamidomethylation; Oxidation (M); Acetylation (K); Ubiquitin; Carbamidomethylation (DHKE X@N-term)	42003	Beta-actin-like protein 2 OS=Homo sapiens GN=ACTBL2 PE=1 SV=2
P08238	146.55	3	452930	2	1		83264	Heat shock protein HSP 90-beta OS=Homo sapiens GN=HSP90AB1 PE=1 SV=4
Q6FI13	140.16	35	0	3	1	Carbamidomethylation (DHKE X@N-term); Carboxymethyl (KW X@N-term)	14095	Histone H2A type 2-A OS=Homo sapiens GN=HIST2H2AA3 PE=1 SV=3
Q16777	140.16	35	0	3	1	Carbamidomethylation (DHKE X@N-term); Carboxymethyl (KW X@N-term)	13988	Histone H2A type 2-C OS=Homo sapiens GN=HIST2H2AC PE=1 SV=4
H0YJ11	118.22	11	4456200	2	1		24382	Alpha-actinin-1 (Fragment) OS=Homo sapiens GN=ACTN1 PE=1 SV=1
H9KV75	118.22	3	4456200	2	1		94826	Alpha-actinin-1 OS=Homo sapiens GN=ACTN1 PE=1 SV=1
P12814	118.22	3	4456200	2	1		103058	Alpha-actinin-1 OS=Homo sapiens GN=ACTN1 PE=1 SV=2
Q4VY20	109.79	19	1895300	1	1		8428	14-3-3 protein beta/alpha (Fragment) OS=Homo sapiens GN=YWHAB PE=1 SV=1
Q4VY19	109.79	14	1895300	1	1		11549	14-3-3 protein beta/alpha (Fragment) OS=Homo sapiens GN=YWHAB PE=1 SV=1
A0A0J9YWE8	109.79	9	1895300	1	1		17410	14-3-3 protein beta/alpha OS=Homo sapiens GN=YWHAB PE=1 SV=1
P31946	109.79	6	1895300	1	1		28082	14-3-3 protein beta/alpha OS=Homo sapiens GN=YWHAB PE=1 SV=3
A0A0J9YWZ2	109.79	17	1895300	1	1		9464	14-3-3 protein beta/alpha (Fragment) OS=Homo sapiens GN=YWHAB PE=1 SV=1
Q01518	105.65	4	4188200	1	1	Phosphorylation (STY); Carbamidomethylation (DHKE X@N-term)	51902	Adenylyl cyclase-associated protein 1 OS=Homo sapiens GN=CAP1 PE=1 SV=5
P31146	100.81	3	462260	1	1		51026	Coronin-1A OS=Homo sapiens GN=CORO1A PE=1 SV=4
P81605	95.75	13	932670	1	1		11284	Dermcidin OS=Homo sapiens GN=DCD PE=1 SV=2
P02792	95.6	9	188450	1	1		20020	Ferritin light chain OS=Homo sapiens GN=FTL PE=1 SV=2
E5RGE1	94.57	27	1001000	1	1		5763	14-3-3 protein zeta/delta (Fragment) OS=Homo sapiens GN=YWHAZ PE=1 SV=8
E5RIR4	94.57	19	1001000	1	1		8434	14-3-3 protein zeta/delta (Fragment) OS=Homo sapiens GN=YWHAZ PE=1 SV=1
E9PD24	94.57	15	1001000	1	1		10612	14-3-3 protein zeta/delta (Fragment) OS=Homo sapiens GN=YWHAZ PE=1 SV=1
E7EVZ2	94.57	14	1001000	1	1		11270	14-3-3 protein zeta/delta (Fragment) OS=Homo sapiens GN=YWHAZ PE=1 SV=1
E7ESK7	94.57	10	1001000	1	1		15697	14-3-3 protein zeta/delta (Fragment) OS=Homo sapiens GN=YWHAZ PE=1 SV=1
P63104	94.57	6	1001000	1	1		27745	14-3-3 protein zeta/delta OS=Homo sapiens GN=YWHAZ PE=1 SV=1
E7EX29	94.57	6	1001000	1	1		28037	14-3-3 protein zeta/delta (Fragment) OS=Homo sapiens GN=YWHAZ PE=1 SV=1
Q96CX2	94.56	5	378360	1	1		35701	BTB/POZ domain-containing protein KCTD12 OS=Homo sapiens GN=KCTD12 PE=1 SV=1
E9PNS3	93.77	18	64695	1	1		8658	Toll-interacting protein OS=Homo sapiens GN=TOLLIP PE=1 SV=1
F2Z2Y8	93.77	7	64695	1	1		23280	Toll-interacting protein OS=Homo sapiens GN=TOLLIP PE=1 SV=1
Q9H0E2	93.77	5	64695	1	1		30282	Toll-interacting protein OS=Homo sapiens GN=TOLLIP PE=1 SV=1
P27824	91.58	3	1782000	1	1		67568	Calnexin OS=Homo sapiens GN=CANX PE=1 SV=2
K7EL66	90.16	13	216500	1	1		15035	Microtubule-associated protein RP/EB family member 2 (Fragment) OS=Homo sapiens GN=MAPRE2 PE=1 SV=1
K7ERD8	90.16	9	216500	1	1		21594	Microtubule-associated protein RP/EB family member 2 (Fragment) OS=Homo sapiens GN=MAPRE2 PE=1 SV=1
Q15555	90.16	6	216500	1	1		37031	Microtubule-associated protein RP/EB family member 2 OS=Homo sapiens GN=MAPRE2 PE=1 SV=1
H7C144	89.08	6	444070	2	1		39002	Alpha-actinin-4 (Fragment) OS=Homo sapiens GN=ACTN4 PE=1 SV=1
F5GXS2	89.08	4	444070	2	1		59564	Alpha-actinin-4 OS=Homo sapiens GN=ACTN4 PE=1 SV=2
O43707	89.08	2	444070	2	1		104854	Alpha-actinin-4 OS=Homo sapiens GN=ACTN4 PE=1 SV=2
P07900	88.69	2	346320	2	1		84660	Heat shock protein HSP 90-alpha OS=Homo sapiens GN=HSP90AA1 PE=1 SV=5
C9JXK0	87.9	7	558320	1	1		24284	Lamin-B receptor (Fragment) OS=Homo sapiens GN=LBR PE=1 SV=1
Q14739	87.9	2	558320	1	1		70703	Lamin-B receptor OS=Homo sapiens GN=LBR PE=1 SV=2
F5H823	87.22	12	1655300	1	1		11917	Ras-related protein Rap-1b (Fragment) OS=Homo sapiens GN=RAP1B PE=1 SV=1
B7ZB78	87.22	10	1655300	1	1		13510	Ras-related protein Rap-1b OS=Homo sapiens GN=RAP1B PE=1 SV=1
F5GZG1	87.22	10	1655300	1	1		13832	Ras-related protein Rap-1b (Fragment) OS=Homo sapiens GN=RAP1B PE=1 SV=8
F5GX62	87.22	9	1655300	1	1		15747	Ras-related protein Rap-1b (Fragment) OS=Homo sapiens GN=RAP1B PE=1 SV=1
E7ESV4	87.22	8	1655300	1	1		17682	Ras-related protein Rap-1b (Fragment) OS=Homo sapiens GN=RAP1B PE=1 SV=1
A0A0J9YXB3	87.22	7	1655300	1	1		18851	Uncharacterized protein OS=Homo sapiens PE=4 SV=1
F5H7Y6	87.22	7	1655300	1	1		20400	Ras-related protein Rap-1b OS=Homo sapiens GN=RAP1B PE=1 SV=1
A6NIZ1	87.22	7	1655300	1	1		20925	Ras-related protein Rap-1b-like protein OS=Homo sapiens PE=2 SV=1
P61224	87.22	7	1655300	1	1		20825	Ras-related protein Rap-1b OS=Homo sapiens GN=RAP1B PE=1 SV=1
P62834	87.22	7	1655300	1	1		20987	Ras-related protein Rap-1A OS=Homo sapiens GN=RAP1A PE=1 SV=1
P62750	84.67	9	3420800	1	1	Carbamidomethylation (DHKE X@N-term)	17695	60S ribosomal protein L23a OS=Homo sapiens GN=RPL23A PE=1 SV=1
Q15651	81.29	15	9029300	1	1	Carbamidomethylation (DHKE X@N-term)	10666	High mobility group nucleosome-binding domain-containing protein 3 OS=Homo sapiens GN=HMGN3 PE=1 SV=2
A0A087WZE9	81.29	12	9029300	1	1	Carbamidomethylation (DHKE X@N-term)	13957	High mobility group nucleosome-binding domain-containing protein 3 OS=Homo sapiens GN=HMGN3 PE=1 SV=1
P35241	79.98	5	539490	2	1	Carbamidomethylation (DHKE X@N-term)	68564	Radixin OS=Homo sapiens GN=RDX PE=1 SV=1
P78417	79.83	6	335720	1	1		27566	Glutathione S-transferase omega-1 OS=Homo sapiens GN=GSTO1 PE=1 SV=2
E7EQR4	79.74	3	658290	2	1		69372	Ezrin OS=Homo sapiens GN=EZR PE=1 SV=3
P15311	79.74	3	658290	2	1		69413	Ezrin OS=Homo sapiens GN=EZR PE=1 SV=4
P80723	79.12	6	456090	1	1		22693	Brain acid soluble protein 1 OS=Homo sapiens GN=BASP1 PE=1 SV=2
V9GZ37	78.85	2	1929400	1	1	Carbamidomethylation	51947	Heat shock 70 kDa protein 1A OS=Homo sapiens GN=HSPA1A PE=1 SV=1
P0DMV8	78.85	2	1929400	1	1	Carbamidomethylation	70052	Heat shock 70 kDa protein 1A OS=Homo sapiens GN=HSPA1A PE=1 SV=1
P0DMV9	78.85	2	1929400	1	1	Carbamidomethylation	70052	Heat shock 70 kDa protein 1B OS=Homo sapiens GN=HSPA1B PE=1 SV=1
A0A0G2JIW1	78.85	2	1929400	1	1	Carbamidomethylation	70109	Heat shock 70 kDa protein 1B OS=Homo sapiens GN=HSPA1B PE=1 SV=1
P17066	78.85	2	1929400	1	1	Carbamidomethylation	71028	Heat shock 70 kDa protein 6 OS=Homo sapiens GN=HSPA6 PE=1 SV=2
P48741	78.85	3	1929400	1	1	Carbamidomethylation	40244	Putative heat shock 70 kDa protein 7 OS=Homo sapiens GN=HSPA7 PE=5 SV=2
O00479	78.58	17	6308800	1	1		9539	High mobility group nucleosome-binding domain-containing protein 4 OS=Homo sapiens GN=HMGN4 PE=1 SV=3
S4R418	75.91	2	4416500	1	1		59033	Bridging integrator 2 (Fragment) OS=Homo sapiens GN=BIN2 PE=1 SV=2
F5H0W4	75.91	2	4416500	1	1		59186	Bridging integrator 2 OS=Homo sapiens GN=BIN2 PE=1 SV=1
A0A0A0MT10	75.91	2	4416500	1	1		59864	Bridging integrator 2 (Fragment) OS=Homo sapiens GN=BIN2 PE=1 SV=1
Q9UBW5	75.91	2	4416500	1	1		61875	Bridging integrator 2 OS=Homo sapiens GN=BIN2 PE=1 SV=3
A0A087X188	75.91	2	4416500	1	1		65024	Bridging integrator 2 OS=Homo sapiens GN=BIN2 PE=1 SV=1
P13639	67.4	1	277860	1	1		95338	Elongation factor 2 OS=Homo sapiens GN=EEF2 PE=1 SV=4
D6R9B6	67.19	8	31195	1	1		16536	40S ribosomal protein S3a OS=Homo sapiens GN=RPS3A PE=1 SV=1
H0Y9Y4	67.19	6	31195	1	1		23528	40S ribosomal protein S3a (Fragment) OS=Homo sapiens GN=RPS3A PE=1 SV=1
D6RAT0	67.19	5	31195	1	1		25887	40S ribosomal protein S3a OS=Homo sapiens GN=RPS3A PE=1 SV=1
P61247	67.19	5	31195	1	1		29945	40S ribosomal protein S3a OS=Homo sapiens GN=RPS3A PE=1 SV=2
E9PK31	67.03	13	201960	1	1		11171	Vascular non-inflammatory molecule 2 (Fragment) OS=Homo sapiens GN=VNN2 PE=1 SV=1
E9PRD9	67.03	13	201960	1	1		11498	Vascular non-inflammatory molecule 2 (Fragment) OS=Homo sapiens GN=VNN2 PE=1 SV=1
E9PLK5	67.03	11	201960	1	1		13256	Vascular non-inflammatory molecule 2 OS=Homo sapiens GN=VNN2 PE=1 SV=1
E9PQ75	67.03	10	201960	1	1		14868	Vascular non-inflammatory molecule 2 OS=Homo sapiens GN=VNN2 PE=1 SV=1
E9PL76	67.03	8	201960	1	1		18458	Vascular non-inflammatory molecule 2 (Fragment) OS=Homo sapiens GN=VNN2 PE=1 SV=1
B4DQB2	67.03	7	201960	1	1		20527	Vascular non-inflammatory molecule 2 OS=Homo sapiens GN=VNN2 PE=1 SV=1
J3KQQ7	67.03	6	201960	1	1		24357	Vascular non-inflammatory molecule 2 OS=Homo sapiens GN=VNN2 PE=1 SV=1
J3KQ55	67.03	6	201960	1	1		24796	Vascular non-inflammatory molecule 2 OS=Homo sapiens GN=VNN2 PE=1 SV=1
J3QT03	67.03	4	201960	1	1		32717	Vascular non-inflammatory molecule 2 OS=Homo sapiens GN=VNN2 PE=1 SV=1
O95498	67.03	2	201960	1	1		58503	Vascular non-inflammatory molecule 2 OS=Homo sapiens GN=VNN2 PE=1 SV=3
P33241	66.96	3	3084200	1	1		37192	Lymphocyte-specific protein 1 OS=Homo sapiens GN=LSP1 PE=1 SV=1
E9PBD8	66.96	5	3084200	1	1		24406	Lymphocyte-specific protein 1 (Fragment) OS=Homo sapiens GN=LSP1 PE=1 SV=1
E7EMG9	66.96	4	3084200	1	1		30613	Lymphocyte-specific protein 1 (Fragment) OS=Homo sapiens GN=LSP1 PE=1 SV=1
Q6UWP8	66.59	3	252560	1	1		60541	Suprabasin OS=Homo sapiens GN=SBSN PE=1 SV=2
E9PKH0	65.87	2	0	1	1		67888	Receptor-type tyrosine-protein phosphatase C (Fragment) OS=Homo sapiens GN=PTPRC PE=1 SV=2
M3ZCP1	65.87	1	0	1	1		82982	Receptor-type tyrosine-protein phosphatase C (Fragment) OS=Homo sapiens GN=PTPRC PE=1 SV=1
A0A075B788	65.87	1	0	1	1		85023	Receptor-type tyrosine-protein phosphatase C OS=Homo sapiens GN=PTPRC PE=1 SV=1
X6R433	65.87	1	0	1	1		131130	Receptor-type tyrosine-protein phosphatase C OS=Homo sapiens GN=PTPRC PE=1 SV=1
P08575	65.87	1	0	1	1		147254	Receptor-type tyrosine-protein phosphatase C OS=Homo sapiens GN=PTPRC PE=1 SV=2
A0A0A0MT22	65.87	1	0	1	1		147486	Protein tyrosine phosphatase receptor type C isoform CRA_d OS=Homo sapiens GN=PTPRC PE=1 SV=1
P62942	65.1	12	709340	1	1		11951	Peptidyl-prolyl cis-trans isomerase FKBP1A OS=Homo sapiens GN=FKBP1A PE=1 SV=2
A0A087WZM5	65.1	10	709340	1	1		14927	Peptidylprolyl isomerase OS=Homo sapiens GN=FKBP1A PE=1 SV=1
Q1JUQ3	65.1	35	709340	1	1		3965	FK506 binding protein12 OS=Homo sapiens GN=FKBP12-Exin PE=2 SV=1
A0A087WTS4	65.1	13	709340	1	1		10800	Peptidyl-prolyl cis-trans isomerase FKBP1A OS=Homo sapiens GN=FKBP1A PE=4 SV=1
A0A087WV48	65.1	11	709340	1	1		12680	Uncharacterized protein OS=Homo sapiens PE=4 SV=1
Q13151	64.94	5	195140	1	1		30841	Heterogeneous nuclear ribonucleoprotein A0 OS=Homo sapiens GN=HNRNPA0 PE=1 SV=1
F8VUA6	64.45	8	559950	1	1		14529	60S ribosomal protein L18 (Fragment) OS=Homo sapiens GN=RPL18 PE=1 SV=1
F8VYV2	64.45	8	559950	1	1		15639	60S ribosomal protein L18 OS=Homo sapiens GN=RPL18 PE=1 SV=1
A0A075B7A0	64.45	7	559950	1	1		16198	60S ribosomal protein L18 OS=Homo sapiens GN=RPL18 PE=1 SV=1
G3V203	64.45	6	559950	1	1		18756	60S ribosomal protein L18 OS=Homo sapiens GN=RPL18 PE=1 SV=1
H0YHA7	64.45	6	559950	1	1		18982	60S ribosomal protein L18 (Fragment) OS=Homo sapiens GN=RPL18 PE=1 SV=1
Q07020	64.45	5	559950	1	1		21634	60S ribosomal protein L18 OS=Homo sapiens GN=RPL18 PE=1 SV=2
J3QQ67	64.45	5	559950	1	1		21847	60S ribosomal protein L18 (Fragment) OS=Homo sapiens GN=RPL18 PE=1 SV=1
P04040	62.74	2	2182100	1	1		59756	Catalase OS=Homo sapiens GN=CAT PE=1 SV=3
F2Z393	60.43	3	1240200	1	1		35329	Transaldolase OS=Homo sapiens GN=TALDO1 PE=1 SV=1
P37837	60.43	3	1240200	1	1		37540	Transaldolase OS=Homo sapiens GN=TALDO1 PE=1 SV=2
J3QR09	59.98	5	872940	1	1		23135	Ribosomal protein L19 OS=Homo sapiens GN=RPL19 PE=1 SV=1
J3KTE4	59.98	5	872940	1	1		23248	Ribosomal protein L19 OS=Homo sapiens GN=RPL19 PE=1 SV=1
P84098	59.98	5	872940	1	1		23466	60S ribosomal protein L19 OS=Homo sapiens GN=RPL19 PE=1 SV=1
H0YLS6	58.88	7	436610	1	1		13948	Proteasome subunit alpha type OS=Homo sapiens GN=PSMA4 PE=1 SV=1
H0YLC2	58.88	5	436610	1	1		19654	Proteasome subunit alpha type OS=Homo sapiens GN=PSMA4 PE=1 SV=1
H0YMI6	58.88	5	436610	1	1		20527	Proteasome subunit alpha type (Fragment) OS=Homo sapiens GN=PSMA4 PE=1 SV=1
H0YMA1	58.88	4	436610	1	1		23271	Proteasome subunit alpha type (Fragment) OS=Homo sapiens GN=PSMA4 PE=1 SV=1
H0YMZ1	58.88	4	436610	1	1		24526	Proteasome subunit alpha type (Fragment) OS=Homo sapiens GN=PSMA4 PE=1 SV=8
H0YL69	58.88	4	436610	1	1		26376	Proteasome subunit alpha type (Fragment) OS=Homo sapiens GN=PSMA4 PE=1 SV=1
P25789	58.88	3	436610	1	1		29484	Proteasome subunit alpha type-4 OS=Homo sapiens GN=PSMA4 PE=1 SV=1
Q5T8U3	58.39	6	499810	1	1		21545	60S ribosomal protein L7a (Fragment) OS=Homo sapiens GN=RPL7A PE=1 SV=1
P62424	58.39	4	499810	1	1		29996	60S ribosomal protein L7a OS=Homo sapiens GN=RPL7A PE=1 SV=2
P38405	56.96	3	1387900	1	1		44309	Guanine nucleotide-binding protein G(olf) subunit alpha OS=Homo sapiens GN=GNAL PE=1 SV=1
P63092	56.96	3	1387900	1	1		45665	Guanine nucleotide-binding protein G(s) subunit alpha isoforms short OS=Homo sapiens GN=GNAS PE=1 SV=1
Q5JWF2	56.96	1	1387900	1	1		111024	Guanine nucleotide-binding protein G(s) subunit alpha isoforms XLas OS=Homo sapiens GN=GNAS PE=1 SV=2
Q03113	56.96	3	1387900	1	1		44279	Guanine nucleotide-binding protein subunit alpha-12 OS=Homo sapiens GN=GNA12 PE=1 SV=4
Q14344	56.96	3	1387900	1	1		44050	Guanine nucleotide-binding protein subunit alpha-13 OS=Homo sapiens GN=GNA13 PE=1 SV=2
G3V169	55.61	2	422150	1	1		40944	Caspase OS=Homo sapiens GN=CASP1 PE=1 SV=1
P29466	55.61	2	422150	1	1		45159	Caspase-1 OS=Homo sapiens GN=CASP1 PE=1 SV=1
O00299	55.41	4	2695900	1	1		26923	Chloride intracellular channel protein 1 OS=Homo sapiens GN=CLIC1 PE=1 SV=4
A2PYH4	55.32	1	5817300	1	1		162609	Probable ATP-dependent DNA helicase HFM1 OS=Homo sapiens GN=HFM1 PE=1 SV=2
H0YFC6	55.19	11	910740	1	1		11687	GTP-binding nuclear protein Ran (Fragment) OS=Homo sapiens GN=RAN PE=1 SV=1
P62826	55.19	5	910740	1	1		24423	GTP-binding nuclear protein Ran OS=Homo sapiens GN=RAN PE=1 SV=3
B5MDF5	55.19	5	910740	1	1		26224	GTP-binding nuclear protein Ran OS=Homo sapiens GN=RAN PE=1 SV=1
J3KQE5	55.19	5	910740	1	1		26816	GTP-binding nuclear protein Ran (Fragment) OS=Homo sapiens GN=RAN PE=1 SV=1
U3KQE7	55.11	11	74524	1	1		13165	Cathepsin S (Fragment) OS=Homo sapiens GN=CTSS PE=1 SV=1
P25774	55.11	4	74524	1	1		37496	Cathepsin S OS=Homo sapiens GN=CTSS PE=1 SV=3
O00602	54.85	2	1564400	1	1	Carbamidomethylation	35078	Ficolin-1 OS=Homo sapiens GN=FCN1 PE=1 SV=2
A0A087WVE2	54.85	2	1564400	1	1	Carbamidomethylation	39182	Ficolin-1 OS=Homo sapiens GN=FCN1 PE=1 SV=1
F8VX11	53.12	3	601140	1	1		41455	Eukaryotic translation initiation factor 4B (Fragment) OS=Homo sapiens GN=EIF4B PE=1 SV=1
P23588	53.12	2	601140	1	1		69151	Eukaryotic translation initiation factor 4B OS=Homo sapiens GN=EIF4B PE=1 SV=2
E7EX17	53.12	2	601140	1	1		69698	Eukaryotic translation initiation factor 4B OS=Homo sapiens GN=EIF4B PE=1 SV=1
Q00610	52.58	1	285070	1	1		191613	Clathrin heavy chain 1 OS=Homo sapiens GN=CLTC PE=1 SV=5
A0A087WVQ6	52.58	1	285070	1	1		192057	Clathrin heavy chain OS=Homo sapiens GN=CLTC PE=1 SV=1
C9J9W2	51.87	7	237750	1	1		18980	LIM and SH3 domain protein 1 (Fragment) OS=Homo sapiens GN=LASP1 PE=1 SV=1
Q14847	51.87	5	237750	1	1		29717	LIM and SH3 domain protein 1 OS=Homo sapiens GN=LASP1 PE=1 SV=2
O95497	51.48	2	1085300	1	1		57012	Pantetheinase OS=Homo sapiens GN=VNN1 PE=1 SV=2
E7EUI8	51.35	3	1856000	1	1		38451	Glucose-6-phosphate 1-dehydrogenase (Fragment) OS=Homo sapiens GN=G6PD PE=1 SV=8
P11413	51.35	2	1856000	1	1		59257	Glucose-6-phosphate 1-dehydrogenase OS=Homo sapiens GN=G6PD PE=1 SV=4
Q13011	51.23	4	229120	1	1		35816	Delta(3 5)-Delta(2 4)-dienoyl-CoA isomerase mitochondrial OS=Homo sapiens GN=ECH1 PE=1 SV=2
Q02878	50.81	3	540000	1	1		32728	60S ribosomal protein L6 OS=Homo sapiens GN=RPL6 PE=1 SV=3
F8VR69	50.81	14	540000	1	1		7191	60S ribosomal protein L6 (Fragment) OS=Homo sapiens GN=RPL6 PE=1 SV=8
F8VZ45	50.81	6	540000	1	1		17800	60S ribosomal protein L6 (Fragment) OS=Homo sapiens GN=RPL6 PE=1 SV=1
U3KQR5	50.81	6	540000	1	1		17928	60S ribosomal protein L6 (Fragment) OS=Homo sapiens GN=RPL6 PE=1 SV=1
E9PMA9	50.6	14	90709	1	1		8428	Ribonuclease inhibitor OS=Homo sapiens GN=RNH1 PE=1 SV=1
E9PMN0	50.6	7	90709	1	1		18106	Ribonuclease inhibitor OS=Homo sapiens GN=RNH1 PE=1 SV=1
E9PIK5	50.6	6	90709	1	1		19228	Ribonuclease inhibitor (Fragment) OS=Homo sapiens GN=RNH1 PE=1 SV=1
E9PMJ3	50.6	6	90709	1	1		20476	Ribonuclease inhibitor (Fragment) OS=Homo sapiens GN=RNH1 PE=1 SV=1
E9PLZ3	50.6	6	90709	1	1		20990	Ribonuclease inhibitor (Fragment) OS=Homo sapiens GN=RNH1 PE=1 SV=1
E9PIM9	50.6	6	90709	1	1		21521	Ribonuclease inhibitor (Fragment) OS=Homo sapiens GN=RNH1 PE=1 SV=1
P13489	50.6	2	90709	1	1		49974	Ribonuclease inhibitor OS=Homo sapiens GN=RNH1 PE=1 SV=2
J3JS69	50.3	10	1183700	1	1		9767	40S ribosomal protein S18 OS=Homo sapiens GN=RPS18 PE=1 SV=1
P62269	50.3	5	1183700	1	1		17719	40S ribosomal protein S18 OS=Homo sapiens GN=RPS18 PE=1 SV=3
Q86V81	49.89	4	0	1	1		26888	THO complex subunit 4 OS=Homo sapiens GN=ALYREF PE=1 SV=3
E9PB61	49.89	4	0	1	1		27558	THO complex subunit 4 OS=Homo sapiens GN=ALYREF PE=1 SV=1
P42766	49.76	7	614320	1	1		14551	60S ribosomal protein L35 OS=Homo sapiens GN=RPL35 PE=1 SV=2
P56385	49.17	14	1856000	1	1		7933	ATP synthase subunit e mitochondrial OS=Homo sapiens GN=ATP5I PE=1 SV=2
M0QY96	49.1	8	451800	1	1		12462	Heterogeneous nuclear ribonucleoprotein M (Fragment) OS=Homo sapiens GN=HNRNPM PE=1 SV=1
M0R2I7	49.1	4	451800	1	1		22708	Heterogeneous nuclear ribonucleoprotein M (Fragment) OS=Homo sapiens GN=HNRNPM PE=1 SV=1
A0A087X0X3	49.1	1	451800	1	1		77570	Heterogeneous nuclear ribonucleoprotein M OS=Homo sapiens GN=HNRNPM PE=1 SV=1
P52272	49.1	1	451800	1	1		77516	Heterogeneous nuclear ribonucleoprotein M OS=Homo sapiens GN=HNRNPM PE=1 SV=3
Q15198	48.91	4	85873	1	1		41861	Platelet-derived growth factor receptor-like protein OS=Homo sapiens GN=PDGFRL PE=1 SV=1
P19105	47.15	6	2031300	1	1		19794	Myosin regulatory light chain 12A OS=Homo sapiens GN=MYL12A PE=1 SV=2
P24844	47.15	6	2031300	1	1		19827	Myosin regulatory light polypeptide 9 OS=Homo sapiens GN=MYL9 PE=1 SV=4
O14950	47.15	6	2031300	1	1		19779	Myosin regulatory light chain 12B OS=Homo sapiens GN=MYL12B PE=1 SV=2
J3QRS3	47.15	6	2031300	1	1		20457	Myosin regulatory light chain 12A OS=Homo sapiens GN=MYL12A PE=1 SV=1
Q9BVA1	46.78	2	0	1	1		49953	Tubulin beta-2B chain OS=Homo sapiens GN=TUBB2B PE=1 SV=1
Q13885	46.78	2	0	1	1		49907	Tubulin beta-2A chain OS=Homo sapiens GN=TUBB2A PE=1 SV=1
Q5ST81	46.78	2	0	1	1		41742	Tubulin beta chain OS=Homo sapiens GN=TUBB PE=1 SV=1
A0A075B736	46.78	2	0	1	1		45696	Tubulin beta chain OS=Homo sapiens GN=TUBB8 PE=1 SV=1
Q5SQY0	46.78	2	0	1	1		45492	Tubulin beta chain OS=Homo sapiens GN=TUBB8 PE=1 SV=1
Q5JP53	46.78	2	0	1	1		47767	Tubulin beta chain OS=Homo sapiens GN=TUBB PE=1 SV=1
A6NNZ2	46.78	2	0	1	1		49573	Tubulin beta-8 chain-like protein LOC260334 OS=Homo sapiens PE=1 SV=1
P07437	46.78	2	0	1	1		49671	Tubulin beta chain OS=Homo sapiens GN=TUBB PE=1 SV=2
Q3ZCM7	46.78	2	0	1	1		49776	Tubulin beta-8 chain OS=Homo sapiens GN=TUBB8 PE=1 SV=2
P68371	46.78	2	0	1	1		49831	Tubulin beta-4B chain OS=Homo sapiens GN=TUBB4B PE=1 SV=1
Q9H4B7	46.78	2	0	1	1		50327	Tubulin beta-1 chain OS=Homo sapiens GN=TUBB1 PE=1 SV=1
P00558	46.51	3	880140	1	1		44615	Phosphoglycerate kinase 1 OS=Homo sapiens GN=PGK1 PE=1 SV=3
E7ERA2	46.41	19	0	1	1		7208	Ribosomal protein L15 OS=Homo sapiens GN=RPL15 PE=1 SV=1
E7EX53	46.41	8	0	1	1		15722	Ribosomal protein L15 (Fragment) OS=Homo sapiens GN=RPL15 PE=1 SV=1
E7EQV9	46.41	6	0	1	1		20510	Ribosomal protein L15 (Fragment) OS=Homo sapiens GN=RPL15 PE=1 SV=1
E7ENU7	46.41	6	0	1	1		20495	Ribosomal protein L15 (Fragment) OS=Homo sapiens GN=RPL15 PE=1 SV=1
P61313	46.41	5	0	1	1		24146	60S ribosomal protein L15 OS=Homo sapiens GN=RPL15 PE=1 SV=2
E9PS78	45.73	9	2211600	1	1		10703	Cathepsin B (Fragment) OS=Homo sapiens GN=CTSB PE=1 SV=1
E9PR54	45.73	8	2211600	1	1		11375	Cathepsin B (Fragment) OS=Homo sapiens GN=CTSB PE=1 SV=1
E9PJ67	45.73	8	2211600	1	1		11760	Cathepsin B (Fragment) OS=Homo sapiens GN=CTSB PE=1 SV=1
E9PCB3	45.73	7	2211600	1	1		12682	Cathepsin B OS=Homo sapiens GN=CTSB PE=1 SV=2
E9PKQ7	45.73	6	2211600	1	1		15377	Cathepsin B (Fragment) OS=Homo sapiens GN=CTSB PE=1 SV=1
E9PNL5	45.73	6	2211600	1	1		16082	Cathepsin B (Fragment) OS=Homo sapiens GN=CTSB PE=1 SV=1
E9PHZ5	45.73	5	2211600	1	1		16576	Cathepsin B (Fragment) OS=Homo sapiens GN=CTSB PE=1 SV=8
E9PLY3	45.73	5	2211600	1	1		18515	Cathepsin B (Fragment) OS=Homo sapiens GN=CTSB PE=1 SV=1
E9PSG5	45.73	5	2211600	1	1		18929	Cathepsin B (Fragment) OS=Homo sapiens GN=CTSB PE=1 SV=1
E9PQM1	45.73	5	2211600	1	1		19478	Cathepsin B (Fragment) OS=Homo sapiens GN=CTSB PE=1 SV=1
P07858	45.73	2	2211600	1	1		37822	Cathepsin B OS=Homo sapiens GN=CTSB PE=1 SV=3
H3BM89	44.86	3	762930	1	1		37657	60S ribosomal protein L4 OS=Homo sapiens GN=RPL4 PE=1 SV=1
P36578	44.86	2	762930	1	1		47697	60S ribosomal protein L4 OS=Homo sapiens GN=RPL4 PE=1 SV=5
Q96CT7	43.71	4	224780	1	1		25835	Coiled-coil domain-containing protein 124 OS=Homo sapiens GN=CCDC124 PE=1 SV=1
C9J1Z8	43.32	7	545090	1	1		17107	ADP-ribosylation factor 5 (Fragment) OS=Homo sapiens GN=ARF5 PE=1 SV=1
P84085	43.32	6	545090	1	1		20530	ADP-ribosylation factor 5 OS=Homo sapiens GN=ARF5 PE=1 SV=2
E7EVW7	42.99	2	1720600	1	1		49704	Hematopoietic lineage cell-specific protein OS=Homo sapiens GN=HCLS1 PE=1 SV=1
P14317	42.99	2	1720600	1	1		54014	Hematopoietic lineage cell-specific protein OS=Homo sapiens GN=HCLS1 PE=1 SV=3
Q5VZR0	42.91	8	69828	1	1		14213	Golgi-associated plant pathogenesis-related protein 1 OS=Homo sapiens GN=GLIPR2 PE=1 SV=1
Q9H4G4	42.91	6	69828	1	1		17218	Golgi-associated plant pathogenesis-related protein 1 OS=Homo sapiens GN=GLIPR2 PE=1 SV=3
Q8TE73	42.74	0	364030	1	1		529026	Dynein heavy chain 5 axonemal OS=Homo sapiens GN=DNAH5 PE=1 SV=3
J3KSC4	42.13	6	1591800	1	1		14831	Ras-related C3 botulinum toxin substrate 3 (Fragment) OS=Homo sapiens GN=RAC3 PE=1 SV=1
J3QLK0	42.13	6	1591800	1	1		15412	Ras-related C3 botulinum toxin substrate 3 (Fragment) OS=Homo sapiens GN=RAC3 PE=1 SV=1
B1AH77	42.13	5	1591800	1	1		16775	Ras-related C3 botulinum toxin substrate 2 OS=Homo sapiens GN=RAC2 PE=1 SV=1
B1AH80	42.13	4	1591800	1	1		20799	Ras-related C3 botulinum toxin substrate 2 OS=Homo sapiens GN=RAC2 PE=1 SV=1
P63000	42.13	4	1591800	1	1		21450	Ras-related C3 botulinum toxin substrate 1 OS=Homo sapiens GN=RAC1 PE=1 SV=1
P60763	42.13	4	1591800	1	1		21379	Ras-related C3 botulinum toxin substrate 3 OS=Homo sapiens GN=RAC3 PE=1 SV=1
P15153	42.13	4	1591800	1	1		21429	Ras-related C3 botulinum toxin substrate 2 OS=Homo sapiens GN=RAC2 PE=1 SV=1
P10606	42.07	6	861680	1	1		13696	Cytochrome c oxidase subunit 5B mitochondrial OS=Homo sapiens GN=COX5B PE=1 SV=2
Q5TFQ8	41.2	4	31470	1	1		43359	Signal-regulatory protein beta-1 isoform 3 OS=Homo sapiens GN=SIRPB1 PE=1 SV=1
P78324	41.2	3	31470	1	1		54967	Tyrosine-protein phosphatase non-receptor type substrate 1 OS=Homo sapiens GN=SIRPA PE=1 SV=2
P20160	40.63	3	3139900	1	1		26886	Azurocidin OS=Homo sapiens GN=AZU1 PE=1 SV=3
U3KPS2	40.48	4	1137600	1	1		23611	Myeloblastin OS=Homo sapiens GN=PRTN3 PE=1 SV=1
P24158	40.48	3	1137600	1	1		27807	Myeloblastin OS=Homo sapiens GN=PRTN3 PE=1 SV=3
O75367	40.38	2	438690	1	1		39617	Core histone macro-H2A.1 OS=Homo sapiens GN=H2AFY PE=1 SV=4
Q9NQ39	40.34	6	1638000	1	1		20120	Putative 40S ribosomal protein S10-like OS=Homo sapiens GN=RPS10P5 PE=5 SV=1
Q09666	39.42	0	2790700	1	1		629114	Neuroblast differentiation-associated protein AHNAK OS=Homo sapiens GN=AHNAK PE=1 SV=2
P62318	39.05	7	205010	1	1		13916	Small nuclear ribonucleoprotein Sm D3 OS=Homo sapiens GN=SNRPD3 PE=1 SV=1
E7EU81	39.04	1	984120	1	1		188227	Golgin subfamily B member 1 (Fragment) OS=Homo sapiens GN=GOLGB1 PE=1 SV=1
Q14789	39.04	0	984120	1	1		376019	Golgin subfamily B member 1 OS=Homo sapiens GN=GOLGB1 PE=1 SV=2
A2A3R7	38.79	9	402000	1	1		10415	40S ribosomal protein S6 OS=Homo sapiens GN=RPS6 PE=1 SV=1
P62753	38.79	3	402000	1	1		28681	40S ribosomal protein S6 OS=Homo sapiens GN=RPS6 PE=1 SV=1
P55072	38.62	1	296960	1	1		89322	Transitional endoplasmic reticulum ATPase OS=Homo sapiens GN=VCP PE=1 SV=4
A0A0A0MSI0	38.57	5	406460	1	1		18976	Peroxiredoxin-1 (Fragment) OS=Homo sapiens GN=PRDX1 PE=1 SV=1
Q06830	38.57	4	406460	1	1		22110	Peroxiredoxin-1 OS=Homo sapiens GN=PRDX1 PE=1 SV=1
P55008	38.19	9	0	1	1		16703	Allograft inflammatory factor 1 OS=Homo sapiens GN=AIF1 PE=1 SV=1
Q5STX8	38.19	8	0	1	1		18038	Allograft inflammatory factor 1 (Fragment) OS=Homo sapiens GN=AIF1 PE=1 SV=1
H7C2Z6	37.74	5	1968200	1	1		16831	Grancalcin (Fragment) OS=Homo sapiens GN=GCA PE=1 SV=1
H7BXD5	37.74	4	1968200	1	1		22109	Grancalcin OS=Homo sapiens GN=GCA PE=1 SV=1
P28676	37.74	3	1968200	1	1		24010	Grancalcin OS=Homo sapiens GN=GCA PE=1 SV=2
P08133	37.37	1	0	1	1		75873	Annexin A6 OS=Homo sapiens GN=ANXA6 PE=1 SV=3
P84103	36.92	5	409120	1	1		19330	Serine/arginine-rich splicing factor 3 OS=Homo sapiens GN=SRSF3 PE=1 SV=1
Q9H1R3	36.32	1	144730	1	1		64685	Myosin light chain kinase 2 skeletal/cardiac muscle OS=Homo sapiens GN=MYLK2 PE=1 SV=3
Q15746	36.32	0	144730	1	1		210713	Myosin light chain kinase smooth muscle OS=Homo sapiens GN=MYLK PE=1 SV=4
Q15759	36.32	2	144730	1	1		41357	Mitogen-activated protein kinase 11 OS=Homo sapiens GN=MAPK11 PE=1 SV=2
O15264	36.32	2	144730	1	1		42090	Mitogen-activated protein kinase 13 OS=Homo sapiens GN=MAPK13 PE=1 SV=1
K7ELS0	35.85	11	0	1	1		13503	Uncharacterized protein C19orf43 OS=Homo sapiens GN=C19orf43 PE=1 SV=1
K7ERU7	35.85	11	0	1	1		13369	Uncharacterized protein C19orf43 OS=Homo sapiens GN=C19orf43 PE=1 SV=1
K7EN60	35.85	9	0	1	1		15612	Uncharacterized protein C19orf43 OS=Homo sapiens GN=C19orf43 PE=1 SV=1
Q9BQ61	35.85	8	0	1	1		18419	Uncharacterized protein C19orf43 OS=Homo sapiens GN=C19orf43 PE=1 SV=1
J3QL05	34.5	6	1192900	1	1		15156	Serine/arginine-rich-splicing factor 2 (Fragment) OS=Homo sapiens GN=SRSF2 PE=1 SV=1
J3KP15	34.5	6	1192900	1	1		15371	Serine/arginine-rich-splicing factor 2 (Fragment) OS=Homo sapiens GN=SRSF2 PE=1 SV=8
Q01130	34.5	4	1192900	1	1		25476	Serine/arginine-rich splicing factor 2 OS=Homo sapiens GN=SRSF2 PE=1 SV=4
Q9BRL6	34.5	3	1192900	1	1		32288	Serine/arginine-rich splicing factor 8 OS=Homo sapiens GN=SRSF8 PE=1 SV=1
Q9P2D3	34.39	1	2537700	1	1	Carbamidomethylation	224300	HEAT repeat-containing protein 5B OS=Homo sapiens GN=HEATR5B PE=1 SV=2
H7C123	34.29	13	0	1	1		10028	60S ribosomal protein L10 (Fragment) OS=Homo sapiens GN=RPL10 PE=1 SV=1
H7C2C5	34.29	9	0	1	1		14597	60S ribosomal protein L10 (Fragment) OS=Homo sapiens GN=RPL10 PE=1 SV=1
F8W7C6	34.29	7	0	1	1		18565	60S ribosomal protein L10 OS=Homo sapiens GN=RPL10 PE=1 SV=2
A0A087WV22	34.29	7	0	1	1		20439	60S ribosomal protein L10 OS=Homo sapiens GN=RPL10 PE=1 SV=1
X1WI28	34.29	6	0	1	1		22975	60S ribosomal protein L10 (Fragment) OS=Homo sapiens GN=RPL10 PE=1 SV=7
P27635	34.29	6	0	1	1		24604	60S ribosomal protein L10 OS=Homo sapiens GN=RPL10 PE=1 SV=4
Q96L21	34.29	6	0	1	1		24519	60S ribosomal protein L10-like OS=Homo sapiens GN=RPL10L PE=1 SV=3
Q6NZI2	34.13	2	549940	1	1		43476	Polymerase I and transcript release factor OS=Homo sapiens GN=PTRF PE=1 SV=1
Q5VY60	34.05	2	0	1	1	Phosphorylation (STY)	91128	HAUS augmin-like complex subunit 6 OS=Homo sapiens GN=HAUS6 PE=1 SV=1
Q7Z4H7	34.05	2	0	1	1	Phosphorylation (STY)	108621	HAUS augmin-like complex subunit 6 OS=Homo sapiens GN=HAUS6 PE=1 SV=2
